1 **Early maternal loss affects diurnal cortisol slopes in immature but not mature wild**  
2 **chimpanzees.**

3

4

5 Cédric Girard-Buttoz<sup>1,2</sup>, Patrick J. Tkaczynski<sup>1,2</sup>, Liran Samuni<sup>2,3,4</sup>, Pawel Fedurek<sup>5</sup>, Cristina  
6 Gomes<sup>6</sup>, Therese Löhlich<sup>7,8</sup>, Virgile Manin<sup>1</sup>, Anna Preis<sup>3</sup>, Prince Valé<sup>2,3,9,10</sup>, Tobias Deschner<sup>3</sup>,  
7 Roman M. Wittig<sup>1,2</sup>, Catherine Crockford<sup>1,2</sup>

8

9 <sup>1</sup> Department of Human Behavior, Ecology and Culture, Max Planck Institute for Evolutionary  
10 Anthropology, Leipzig, Germany

11 <sup>2</sup> Taï Chimpanzee Project, Centre Suisse de Recherches Scientifiques, Abidjan, Ivory Coast

12 <sup>3</sup> Department of Primatology, Max Planck Institute for Evolutionary Anthropology, Leipzig,  
13 Germany

14 <sup>4</sup> Department of Human Evolutionary Biology, Harvard University, Cambridge, MA, USA

15 <sup>5</sup> Division of Psychology, University of Stirling, Stirling, UK

16 <sup>6</sup> Tropical Conservation Institute, Institute of Environment, Florida International University, FL,  
17 USA

18 <sup>7</sup> World Wide Fund for Nature, Dzanga Sangha Protected Areas, BP 1053, Bangui. Central African  
19 Republic

20 <sup>8</sup> Robert Koch Institute, Epidemiology of Highly Pathogenic Microorganisms, Berlin, Germany

21 <sup>9</sup> Centre Suisse de Recherches Scientifiques en Côte d'Ivoire, Abidjan, Côte d'Ivoire

22 <sup>10</sup> Unité de Formation et de Recherche Biosciences, Université Félix Houphouët Boigny, Abidjan,  
23 Côte d'Ivoire

24

25

26

27

28

## 29 **Abstract**

30 In mammals, early life adversity negatively affects survival and reproductive success. A key causal  
31 mechanism is proposed by the biological embedding model which posits that adversity  
32 experienced early in life has deleterious consequences on individual physiology across the  
33 lifespan. In particular, early life adversity is expected to be a severe stressor leading to long-term  
34 alteration of the hypothalamic pituitary adrenal (HPA) axis activity. Here we tested this idea by  
35 assessing whether, as in humans, maternal loss had short and long-term impacts on orphan  
36 chimpanzee urinary cortisol levels and diurnal urinary cortisol slopes, as an indicator of the HPA  
37 axis functioning. We used 18 years of data on 50 immature and 28 mature male wild chimpanzees  
38 belonging to four communities in Tai National Park, Ivory Coast. Immature orphans who  
39 experienced early maternal loss had diurnal cortisol slopes characterised by higher early morning  
40 and late afternoon cortisol levels indicative of high activation of the HPA axis. Recently orphaned  
41 immatures had higher cortisol levels than other immatures, possibly reflecting social and  
42 nutritional stress. However, unlike in humans, we did not find significantly different cortisol  
43 profiles in orphan and non-orphan adult male chimpanzees. Our study highlights that long-term  
44 alteration of stress physiology related to early life adversity may not be viable in some wild animal  
45 populations and/or that chimpanzees, as humans, may have access to mechanisms that buffer this  
46 physiological stress, such as adoption. Our results suggest that biological embedding of altered  
47 HPA axis function is unlikely to be a mechanism contributing to the demonstrated long-term  
48 fitness consequences of maternal loss, such as reduced reproductive success, in wild long-lived  
49 mammals.

50

## 51 **Introduction**

52 In mammals, mothers are essential for the early development of their infants since they provide  
53 post-natal care (Maestriperi & Mateo 2009). Maternal loss in mammals reduces growth (Samuni  
54 et al. 2020), survival (Watts et al. 2009; Andres et al. 2013; Tung et al. 2016; Stanton et al. 2020),  
55 and long-term reproductive success (Andres et al. 2013; Strauss et al. 2020; Crockford et al. 2020,  
56 reviewed in Clutton-Brock 2016).

57 The biological embedding model (Power & Hertzman 1997; Miller et al. 2011; Berens et al. 2017)  
58 posits that adversity experienced early in life, including exposure to severe stressors, can have  
59 deleterious consequences on an individual's physiology and health across their lifespan. This  
60 model provides a promising conceptual framework to investigate the mechanisms underlying the  
61 fitness costs of maternal loss or other forms of early life adversity.

62 Early life adversity impacts several interconnected physiological pathways (reviewed in Berens et  
63 al. 2017) among which the hypothalamic pituitary adrenal (HPA) axis plays a central role (Miller  
64 et al. 2009, 2011; Taylor et al. 2011). The HPA axis is activated in response to internal  
65 physiological challenges and external stressors through a chain of reactions, known as the “stress  
66 response” or “reactive homeostasis” (Romero et al. 2009), which also results in the release of  
67 glucocorticoids (Sapolsky 2002). Exposure to harsh social conditions during childhood, such as  
68 maternal loss, may lead to repeated and prolonged activation of the HPA axis early in life. These  
69 activations provide an adaptive physiological response by mobilising energy which helps children  
70 to cope with the immediate socio-ecological challenges but may result in long-term HPA axis  
71 dysfunction (i.e. either hypo- or hyper-responsiveness to stressor Miller et al. 2011; Ehrlich et al.  
72 2016; Berens et al. 2017). The HPA axis is considered to be at the core of the link between early  
73 life adversity and fitness since repeated activation of the HPA axis over prolonged periods (chronic

74 stress) and/or HPA axis malfunctioning can have detrimental effects on individual overall health  
75 (Sapolsky 2002; Slavich & Cole 2013). For instance, over- and/or prolonged activation of the HPA  
76 axis is known to suppress the immune system (Grossman 1985; Setchell et al. 2010; Slavich &  
77 Cole 2013) and the HPA axis mediates some of the observed negative effects of early life adversity  
78 on the immune response such as elevated levels of inflammatory markers in the blood (Danese et  
79 al. 2011; Ehrlich et al. 2016; Rasmussen et al. 2019, reviewed in Berens et al. 2017). Assessing  
80 the consequences of traumatic early life events, such as maternal loss, on the functioning of the  
81 HPA axis can provide insight into the mechanisms underlying the documented fitness costs of such  
82 events.

83 In humans, maternal loss leads to short and long-term alterations of the HPA axis functioning  
84 (Heim & Nemeroff 2001; Sánchez et al. 2001). These effects are typically studied by investigating  
85 patterns of cortisol excretion, the main glucocorticoid circulating in mammals, including humans.  
86 Cortisol levels follow a diurnal pattern characterized by an early morning peak (awakening  
87 response) and a regular decline throughout the day (Doman et al. 1986). In humans, diurnal cortisol  
88 slopes, and cortisol awakening response, serve as health markers. Deviations from the stereotypical  
89 patterns of high morning and low evening cortisol levels (i.e. flatter diurnal slopes) are typically  
90 interpreted as indications of pathology and HPA axis dysregulation and/or marker of chronic stress  
91 (Pruessner et al. 1999; Sánchez et al. 2001; Clow et al. 2004; Kudielka et al. 2006; Miller et al.  
92 2007). Flattening of diurnal cortisol slopes reflect a compression in the dynamic range of the HPA  
93 axis functioning (Karlmanngla et al. 2019) which is indicative of lowered ability to respond  
94 optimally to stressors and to down-regulate hormonal stress levels. In turn, flatter diurnal cortisol  
95 slopes may lead to direct fitness costs in humans such as reduced survival (Sephton et al. 2000).

96 To test conclusively the biological embedding model, the physiological consequences of maternal  
97 loss must be investigated during both during childhood and adulthood. Studies during childhood  
98 and in the time directly following maternal loss allow the assessment of the proximate responses  
99 of orphans in coping with new social challenges, while studies during adulthood allow the  
100 assessment of the long-lasting effect of early-life adversity. In humans, orphaned children typically  
101 exhibit lower cortisol awakening response (Carlson & Earls 1997) or higher evening cortisol levels  
102 (Gunnar et al. 2001) than mother-reared children, leading to overall flatter diurnal cortisol slopes  
103 (Carlson & Earls 1997; Tarullo & Gunnar 2006). Other forms of early life adversity, such as  
104 maltreatment by parents, parent divorce or placement in foster families, are also associated with  
105 flatter diurnal cortisol slopes (Kaufman 1991; Dozier et al. 2006; Bernard et al. 2015; McLachlan  
106 et al. 2016) and with lower morning cortisol levels (Hart et al. 1996; Meinlschmidt & Heim 2005).  
107 Early life adversity can also be associated with higher cortisol levels throughout the day, especially  
108 in children who experienced serious neglect (Cicchetti & Rogosch 2001; Gunnar et al. 2001;  
109 Wismer Fries et al. 2008).

110 In support of the biological embedding model, several studies in humans documented long-lasting  
111 effects of early life adversity on children's HPA axis functioning (reviewed in Young et al. in  
112 press). Adults up to 64 years old who experienced mistreatment and/or the loss of one or both  
113 parents during childhood, depending on the study, have a lower (Meinlschmidt & Heim 2005;  
114 Kawai et al. 2017) or higher cortisol awakening response (Gonzalez et al. 2009; Butler et al. 2017),  
115 flatter diurnal cortisol slopes (Karlman et al. 2019), and generally higher cortisol levels  
116 throughout the day (Nicolson 2004).

117 Tests of the biological embedding model in wild long-lived animals with a slow life history are  
118 essential to understand if the long-lasting physiological effects of early life adversity found in

119 humans are an artefact of our societies, which enable severely physiologically impaired individuals  
120 to survive until old age. Few studies have examined whether this impacted phenotypes are also  
121 present in adult wild mammals (Beehner & Bergman 2017) or whether HPA axis dysfunction  
122 simply leads to pre-adult death. Wild long-lived mammals are adapted to the environment in which  
123 we typically observe them, and in which selection may have favoured mechanisms of rapid  
124 recovery from early life traumatic events to avoid long-term hyper-activation of the HPA axis (or  
125 chronic stress, Beehner & Bergman 2017). In contrast, western humans, in which most studies on  
126 the impact of early life adversity on HPA axis functioning have been conducted, occupy a  
127 substantially modified environment compared to that in which humans evolved, including access  
128 to medical and institutional cares. As such, they may have reduced “recovery” ability due to  
129 lowered selective pressure associated with improved access to care.

130 A study on wild female baboons, using extensive long-term data, showed that simultaneous  
131 exposure to several forms of early life adversity, and some isolated forms of adversity such as  
132 drought and low maternal rank, leads to an overall elevation in glucocorticoid levels in adulthood  
133 (Rosenbaum et al. 2020), offering support for the biological embedding model. However, maternal  
134 loss in isolation did not lead to long-term elevation of glucocorticoid concentrations suggesting  
135 that baboons may have buffering mechanisms to offset effects of biological embedding for some  
136 forms of early life adversity. To our knowledge, this study on wild baboons constitutes the only  
137 test of the biological embedding model in a wild long-lived non-human mammal. More studies are  
138 necessary to investigate if, or how extensively, the biological embedding model applies to a wider  
139 range of long-lived species, both during development and in adulthood. In particular, it is important  
140 to test this model in long-lived species with a life history closer to that of humans. Baboons start  
141 reproducing one or two years after weaning, whereas humans and great apes, including

142 chimpanzees share an extended juvenile phase between weaning and first reproduction (Wittig &  
143 Boesch 2019a). Furthermore, the study on baboons only assessed one marker of the HPA axis  
144 functioning (i.e. overall glucocorticoid levels) but did not investigate the impact on diurnal cortisol  
145 slopes. Assessment of diurnal cortisol slopes are important since these slopes are a marker of the  
146 HPA axis functioning (Karlamangla et al. 2019).

147 Using a long-term database, including demographic and urinary cortisol data, collected over a 20  
148 year-period on four wild Western chimpanzee communities (*Pan troglodytes verus*) we aimed to  
149 provide rare test of the biological embedding model in a wild long-lived mammal. Specifically,  
150 our dataset allowed us to assess both the short and long-term effects of maternal loss on the HPA  
151 axis activity in wild chimpanzees. We thereby investigated one of the potential physiological  
152 mechanisms explaining the fitness costs associated with maternal loss reported in wild  
153 chimpanzees such as reduced growth, survival, and reproductive success (Nakamura et al. 2014;  
154 Samuni et al. 2020; Stanton et al. 2020; Crockford et al. 2020). Furthermore, studying  
155 physiological effects using diurnal cortisol slopes is an underused paradigm in wild animal subjects  
156 despite its prevalence in the human health literature. In chimpanzees, these slopes are repeatable  
157 in adults (i.e. are consistent within a given individual over time, Sonnweber et al. 2018) but also  
158 show plasticity to physiological challenges such as disease outbreaks (Behringer et al. 2020) or  
159 aging (Emery Thompson et al. 2020).

160 In humans, alloparental care such as placement in a foster family can reverse the physiological  
161 consequences of early life adversity (Gunnar et al. 2001). Like orphan humans, orphan  
162 chimpanzees may have access to buffering mechanisms such as alloparental care and support  
163 provided by conspecifics ranging from tolerance in feeding sites to full adoptions (i.e. daily  
164 consistent provisioning of cares to the orphans such as carrying, grooming, food sharing, Uehara

165 & Nyundo 1983; Goodall 1986; Wroblewski 2008; Boesch et al. 2010; Hobaiter et al. 2014;  
166 Samuni et al. 2019). For immatures, we investigated the effect of maternal loss in both sexes. For  
167 adult individuals, we focused on males, the philopatric sex in chimpanzees (Pusey 1979; Boesch  
168 & Boesch-Achermann 2000), since the early life history of adult females who immigrated as adults  
169 into our study groups is often undocumented.

170 For both age-class groups (male and female immatures and adult males), we first assessed whether  
171 average cortisol levels and the steepness of the diurnal cortisol slopes differed between orphan and  
172 non-orphaned individuals. We predicted that, as in humans, immature orphans would exhibit  
173 higher overall cortisol levels and flatter diurnal cortisol slopes than non-orphans. We also predicted  
174 that, the overall effect of maternal loss on cortisol profiles would be more severe during the first  
175 years following maternal loss. That is because recently orphaned individuals have to adjust  
176 behaviourally and physiologically to a new social situation in which they do not benefit from  
177 maternal support and may have reduced access to food and socio-positive social interactions. Over  
178 time, orphans may adjust to, or may access compensatory strategies for, this new setup, which  
179 could result in lower impact on the HPA axis activity. Accordingly, following peak in alteration  
180 of the orphan cortisol profile directly after maternal loss, we anticipated some decline over time,  
181 but still for cortisol levels to remain elevated in orphans compared to non-orphans. We predicted  
182 this to last even into adulthood, matching the patterns of long lasting HPA activity alteration arising  
183 from maternal loss in humans and for other forms of early life adversity in wild baboons  
184 (Rosenbaum et al. 2020). Finally, we predicted that immature orphans that lost their mothers earlier  
185 in their lives would have flatter diurnal cortisol slopes and overall higher cortisol levels than  
186 immatures who lost their mother at a later age due to a greater level of dependency on mothers in  
187 early ontogeny (Clark 1977; Pusey 1983; Boesch & Boesch-Achermann 2000).



188

189

## 190 **Results**

191 We used the long-term behavioural, demographic and urine sample data of the Tai Chimpanzee  
192 Project (Wittig & Boesch 2019b) collected on four communities of wild Western chimpanzees  
193 (East, North, Middle, and South) in the Tai National Park, Cote d'Ivoire (5°52'N, 7°20'E). The  
194 urine samples included in this study span over 19 years and were collected between 2000 and 2018.  
195 We used a series of Linear Mixed Models (LMMs) to test our predictions regarding the effect of  
196 maternal loss on overall cortisol levels and diurnal slopes (jointly constituting the cortisol profile)  
197 separately in immature males and females (i.e. individuals <12 years of age) and mature males  
198 (i.e. males  $\geq$  12 years of age). For both immatures and mature males, we tested first for  
199 differences in cortisol profiles between orphan and non-orphans (Model 1a for immatures and 1b  
200 for mature males) and, for orphans only, the effect of the age at which the orphan lost their mother  
201 on their cortisol profiles (Model 1b for immature orphans and 2b for mature male orphans). In  
202 addition, for immature orphans, we also tested the effect of the years since maternal loss (Model  
203 1b).

204 In all the models, each urine sample represented a data point and the cortisol concentration of the  
205 sample (expressed in ng/ml SG) was the response variable. We used three predictor variables:

- 206 - *Orphan status*: Binary variable (yes/no) describing whether the immature was an orphan  
207 at the time of sample collection Model 1a, and whether the adult male was orphaned before  
208 reaching 12 years of age (Model 2a).
- 209 - *Age when mother died*: Continuous variable describing the age at which immature orphans  
210 (Model 1b) and mature male orphans (Model 2b) lost their mother.

211 - *Years since maternal loss*: Continuous variable describing the number of years since  
212 immature orphans lost their mother (Model 1b)

213 For each of the models, all of these test predictors were included in interaction with both the linear  
214 and the quadratic terms for time of sample collection to test the effect of these test predictors on  
215 diurnal cortisol slopes. The quadratic term for time of sample collection was included here since a  
216 previous study showed that diurnal cortisol slopes in Tai chimpanzees follow a curved quadratic  
217 pattern (Sonnweber et al. 2018). In all our models we controlled for sex of the individual,  
218 community size, sex ratio of mature individuals in the community, age of the individual (except  
219 for Model 1b because of collinearity issue, see methods), the LCMS method used (“old” or “new”  
220 method, see the *urine analysis* section) and seasonal variation in ecological conditions (see  
221 methods). In addition, we controlled for repeated observations of the same individual over the  
222 same year by incorporating *individual ID* and *year* as random factors in each model. Finally, to  
223 control for the changes in cortisol diurnal slope with age, we built one slope per individual per  
224 year into each model by incorporating the dummy variable “individual\_year” as a random factor.

225

#### 226 *Effect of maternal loss on immature cortisol profiles*

227 For Model 1a, assessing if immature orphans and non-orphans differ in their cortisol profiles, the  
228 full model was not significantly different from the null model (N= 849 samples and 50 individuals,  
229 LRT,  $df=3$ ,  $\chi^2=6.67$ ,  $P=0.083$ ). However, since the p-value was close to the arbitrary threshold of  
230 0.05 we investigated the significance of the predictors in the model, keeping in mind that the  
231 significance of these predictors should be interpreted with caution. In Model 1a, the significant  
232 interaction between *orphan status* and *time of the day* (LRT,  $P=0.016$ , **Table 2**) suggests that

233 immature orphans had a steeper daily cortisol slope than non-orphans (**Figure 1**). This difference  
234 in slopes may stem from higher early morning cortisol levels in immature orphans as compared to  
235 non-orphans (**Figure 1**). The marginal  $R^2$  and the conditional  $R^2$  for Model 1a were 0.259 and  
236 0.606 respectively.

237 The second model (Model 1b) focusing on immature orphans revealed that orphans vary  
238 significantly in their cortisol profiles depending on the age at which their mother died and on the  
239 length of time since they were orphaned (full-null model comparison in Model 1b,  $N= 393$   
240 samples, and 17 individuals, LRT,  $df=6$ ,  $\chi^2=12.82$ ,  $P=0.046$ ). More specifically, immature orphans  
241 whose mother had died several years before sampling had significantly lower cortisol levels than  
242 more recently orphaned immatures (effect of *years since maternal loss* in Model 1b,  $\beta \pm SE = -$   
243  $0.23 \pm 0.09$ ,  $P=0.038$ , **Table 2**, **Figure 2**). To visualise this effect, we computed the average cortisol  
244 levels of individuals orphaned for less than 1 year, 1-2 years, 2-3 years, and 3-4 years as compared  
245 to the cortisol levels of aged-matched non-orphaned chimpanzees (**Figure 3**). The effect of *orphan*  
246 *status* on cortisol levels was apparent for individuals orphaned for less than two years at the time  
247 of sample collection, but orphans returned to “non-orphan” cortisol levels between two and three  
248 years after maternal loss (**Figure 3**).

249 In addition, in Model 1b, significant interaction between *age when mother died* and quadratic term  
250 of *time of day* ( $\beta \pm SE = -0.08 \pm 0.04$ ,  $P=0.030$ , **Table 2**) indicates that the age at which immatures  
251 lost their mother significantly influenced their diurnal cortisol slopes. Immature individuals who  
252 lost their mother before the age of 5 years old (in orange **Figure 4**) had a diurnal cortisol slope that  
253 curved upwards and presented higher early morning and late afternoon cortisol levels than  
254 individuals who lost their mother at an older age. Those who lost their mother between 5 and 8  
255 years of age (in blue in **Figure 4**) had a relatively linear decrease of cortisol throughout the day.

256 Finally, immature individuals orphaned after 8 years of age (in green in **Figure 4**) had a diurnal  
257 cortisol slope that curved downwards with lower early morning and late afternoon cortisol levels  
258 than individuals who lost their mother at a younger age. Please note that we depicted model line  
259 predictions for three age categories corresponding to three life history stages in chimpanzees (0-5  
260 years: infancy, 5-8 years: juvenile period, 8-12 years: early adolescence) in **Figure 4** for ease of  
261 interpretation of the effect but the variable “age when mother died” was incorporated in Model 1b  
262 as a continuous predictor. The marginal  $R^2$  and the conditional  $R^2$  for Model 1b were 0.235 and  
263 0.594 respectively.

264 The results of Model 1b could potentially be explained via an effect of age on cortisol profiles in  
265 immatures. However, the *age of the individual* could not be incorporated as control factor in Model  
266 1b due to collinearity with *age when mother died* and “*years since maternal loss*”. Therefore, we  
267 ran a separate model (Model 1c) to investigate the effect of age on cortisol levels and diurnal  
268 cortisol slopes in non-orphan immatures. In this model the full model was not significantly  
269 different from the null model (N= 454 samples, and 37 individuals, LRT,  $df=3$ ,  $\chi^2=1.98$ ,  $P=0.576$ ).  
270 This indicates that the age of an immature did not significantly influence cortisol levels (as  
271 previously shown in the same population, Tkaczynski et al. 2020) and diurnal cortisol slopes in  
272 our study samples.

### 273 *Effect of maternal loss on cortisol slopes in mature male chimpanzees*

274 In contrast to immature individuals, we did not detect a significant overall effect of *orphan status*  
275 on mature males’ cortisol profiles (full-null model comparison in Model 2a, N= 2184 samples, and  
276 28 individuals, LRT,  $df=3$ ,  $\chi^2=0.51$ ,  $P=0.917$ ). We also did not detect a significant effect of the

277 *age when mother died* on orphan mature males' cortisol profiled (full-null model comparison in  
278 Model 2b, N= 769 samples, and 10 individuals, LRT, df=3,  $\chi^2=2.43$ , P=0.488).

279

280

## 281 **Discussion**

282 While the effect of maternal loss on wild animal survival and reproduction has been recently  
283 established (Foster et al. 2012; Andres et al. 2013; Tung et al. 2016; Walker et al. 2018; Surbeck  
284 et al. 2019; Crockford et al. 2020), the mechanisms underlying these fitness costs remain  
285 understudied. Our study provides one of the rare empirical tests of the biological embedding model  
286 in wild long-lived mammals (see also Rosenbaum et al. 2020), by assessing the short- and long-  
287 term physiological impacts of early maternal loss. While we found an effect of maternal loss on  
288 both overall cortisol levels and diurnal cortisol slopes in immature chimpanzees, these effects were  
289 not present in mature male chimpanzees. These results are in line with the absence of long-term  
290 effects of maternal loss alone on glucocorticoid levels in wild long-lived baboons (Rosenbaum et  
291 al. 2020). This suggests that 1) the biological embedding model (Power & Hertzman 1997; Miller  
292 et al. 2011; Berens et al. 2017) may apply to long-lived wild mammals only following exposure to  
293 a combination of diverse sources of early life adversity or to other sources of early life adversity  
294 than maternal loss (see Rosenbaum et al. 2020) and/or 2) that buffering mechanisms ranging from  
295 minimal alloparental cares to adoption (discussed below) could ameliorate long-term effects of  
296 early life adversity in chimpanzees. Alternatively, in our study, survivorship bias may mean that  
297 chimpanzees with severely altered HPA axis activity following maternal loss did not survive to  
298 adulthood and thus were absent from our adult dataset.

299 In contrast to our prediction, the difference between immature orphan and non-orphan diurnal  
300 cortisol slopes were marginal. Furthermore, immature orphans had a steeper diurnal cortisol slope  
301 than immature non-orphans, and this effect appeared to be driven principally by elevated early  
302 morning cortisol levels in orphans (Figure 1). This contrasts with findings in human studies that  
303 show flatter slopes for individuals that experience adversity (Kaufman 1991; Hart et al. 1996;  
304 Meinlschmidt & Heim 2005; Dozier et al. 2006; Bernard et al. 2015; McLachlan et al. 2016). A  
305 large portion of the variance in Model 1a (36%) was explained by the random effects indicating  
306 that the lack of significance in this analysis may be related to large inter-individual differences,  
307 and in particular largely varying cortisol levels and diurnal cortisol slopes across immature  
308 orphans. This is possibly due to buffering strategies available to some but not all orphans (e.g.  
309 whether the orphan was adopted or not) and to variation in the exposure to energetic and/or  
310 psychological stressors for different orphans due to several factors such as the age of the orphan  
311 when its mother died. In fact, orphans that lost their mother at a younger age had diurnal cortisol  
312 slopes characterised by higher early morning and late afternoon cortisol levels when compared to  
313 immatures orphaned when they were older. We also found a strong elevation in average cortisol  
314 levels in the year directly following maternal loss, followed by a return to cortisol levels  
315 comparable to age-matched non-orphans within 2-3 years after maternal loss.

316 Our results indicate that immature chimpanzees who lost their mother at a young age and/or  
317 recently lost their mothers experience unusually high levels of environmental and social stressors  
318 that challenge their homeostasis (Romero et al. 2009). Most likely, these stressors are social and  
319 energetic in nature, reflecting the lack of care and access to food sources that was initially provided  
320 by the mother (Pusey 1983; Goldenberg & Wittemyer 2017; Samuni et al. 2019). Even after  
321 weaning (which is the case in our study since all orphans were sampled after the weaning age c.a.

322 4 years of age, Samuni et al. 2020, **Table S1**), orphans may be constrained in acquiring the amount  
323 of food necessary to maintain a positive energy balance as they also lack food sharing and socially  
324 facilitated access to high nutrient food sources (Samuni et al. 2019). The elevated early morning  
325 cortisol levels found in orphans who lost their mother at a younger ages could be a sign of dietary  
326 restrictions (Goodwin et al. 1988; Garcia-Belenguer et al. 1993). In the same population, orphans  
327 lose out on growth compared to non-orphans (Samuni et al. 2020). Dietary restriction may thus  
328 also explain why immature orphan chimpanzees tended to have steeper diurnal cortisol slopes and  
329 higher early morning levels than non-orphans.

330 In contrast, in humans, orphans or infants who experienced other forms of early life adversity  
331 typically have blunted diurnal cortisol slopes and lower awakening morning responses (Kaufman  
332 1991; Hart et al. 1996; Meinlschmidt & Heim 2005; Dozier et al. 2006; Bernard et al. 2015;  
333 McLachlan et al. 2016). This difference between chimpanzees and humans may stem from higher  
334 exposure to nutritional stress in immature orphan chimpanzees, as compared to orphan humans (at  
335 least in the Western human populations studied). Nutritional stress may also explain why we found  
336 that immatures who lost their mothers at a younger age had significantly higher afternoon cortisol  
337 levels and that the average cortisol levels (i.e. throughout the day) of orphans were elevated during  
338 the first two years following maternal loss.

339 These higher afternoon and average cortisol levels may also reflect exposure of orphans to social  
340 stress. In fact, immature chimpanzees who have lost their mother play for shorter periods of time  
341 (Botero et al. 2013), and play bouts escalate more frequently into aggression (van Leeuwen et al.  
342 2014). This could, in turn, lead to increased cortisol levels since in chimpanzees and other  
343 primates, aggression generally increases cortisol levels (Girard-Buttoz et al. 2009; Emery  
344 Thompson et al. 2010; Wittig et al. 2015; but see Preis et al. 2019). Furthermore, strong social

345 relationships, which some orphans may lack, can buffer the effect of environmental stressors on  
346 cortisol secretion in primates (Young et al. 2014; Wittig et al. 2016). Cumulatively, this suggests  
347 that new orphans and/or those who lost their mother at a young age may be more exposed to social  
348 and psychological stressors as well as reduced access to social mechanisms to buffer such stressors.  
349 The social factors affecting chimpanzee orphans may be similar to those impacting human orphans  
350 who are frequent targets of assault, either physical or sexual due to a lack of social support from a  
351 caregiver (e.g. Frank et al. 1996). It is thus not surprising that, overall, our results are in line with  
352 human and captive rodent studies showing that early life adversity elevates immature  
353 glucocorticoid levels (Cicchetti & Rogosch 2001; Gunnar et al. 2001; Meaney & Szyf 2005;  
354 Wismer Fries et al. 2008; Zhang et al. 2013).

355 While the effects of maternal loss on immatures physiology are comparable in humans and  
356 chimpanzees, the chimpanzee pattern differs strongly from that of humans, in that the effect of  
357 maternal loss on cortisol secretion profile did not persist into adulthood. Adult humans up to 64  
358 years old, that experienced mistreatment and/or the loss of one or both parents during childhood,  
359 still present alteration of their diurnal cortisol slopes and overall cortisol levels (Nicolson 2004;  
360 Meinlschmidt & Heim 2005; Gonzalez et al. 2009; Kawai et al. 2017; Butler et al. 2017;  
361 Karlamangla et al. 2019). The re-establishment of a normal functioning of the HPA axis in mature  
362 male chimpanzees may reflect a form of recovery in those males. However, in our sample of  
363 mature males, we could, by definition, only sample individuals who survived until maturity. As a  
364 result, we cannot rule out the possibility that the orphaned infants most severely affected by  
365 maternal loss and who faced the strongest social and nutritional stress died at a young age and  
366 never reached adulthood. Unfortunately, we were only able to sample two immature chimpanzees  
367 the year before they died so we cannot evaluate the effect of cortisol profiles on individual survival.



368 Our study showed that individuals who lost their mother at a younger age had the most altered  
369 functioning of their HPA axis which could be one of the mechanisms explaining why other studies  
370 found that the younger an individual is when orphaned the less likely it is to survive into adulthood  
371 (Nakamura et al. 2014; Stanton et al. 2020). Furthermore, long-term alteration of the HPA axis  
372 functioning related to early life adversity is explained, at least partly, by epigenetic mechanisms  
373 (Weaver et al. 2004) and in particular by a hyper methylation of DNA in regions coding for the  
374 glucocorticoid receptors (GR) in the brain (Liu et al. 1997; Weaver et al. 2007, reviewed in Zhang  
375 et al. 2013). In rodents tested in laboratory conditions, these alterations of the GR in the brain take  
376 place early in life; a lower density of GR reduces the effectiveness of the glucocorticoid negative  
377 feedback loop and ultimately results in prolonged elevated cortisol levels (Zhang et al. 2013). All  
378 orphan adult males in our study were orphaned after they were four years of age, an age at which  
379 the epigenetic effect on GR in the brain may be reduced or absent. In addition, in captive rodents,  
380 this effect can be reversed following cross-fostering (Weaver et al. 2004), which may be equivalent  
381 to alloparental care or adoption in wild chimpanzees.

382 In chimpanzees, adoption is a common phenomenon (Uehara & Nyundo 1983; Goodall 1986;  
383 Wroblewski 2008; Boesch et al. 2010; Hobaiter et al. 2014; Samuni et al. 2019). Adopters typically  
384 provide surrogate care for the orphan in the form of grooming, limited provisioning through food  
385 sharing, agonistic support, and even carrying (Samuni et al. 2019). As a result, adoption increases  
386 the survival probability of the orphan (Hobaiter et al. 2014). It is possible that the adoption of  
387 immature orphan chimpanzees also alleviates some of the effects of maternal loss on cortisol as  
388 observed in humans (Gunnar et al. 2001). Unfortunately, data were insufficient to evaluate  
389 effectively the effect of adoption on cortisol excretion profiles in this sample (adoption status is  
390 available for 9 out of 17 orphans, **Table S1**). Most orphans for whom we have data were adopted

391 at some point during their immature years (**Table S1**) but the level of care provided by the adopter  
392 varies greatly across orphans (Samuni et al. 2019). Variation in the degree of care received by the  
393 orphans could explain the very large variation in cortisol levels observed between individuals  
394 within the first year after their mother's death (**Figure S1**) but we do not have enough orphans in  
395 our study to assess the effect of the intensity of alloparental care.

396 In conclusion, our study provides evidence of an effect of early life adversity on cortisol levels and  
397 diurnal cortisol slopes in immatures of a wild mammal population. Interestingly, our study  
398 provides contrasts to studies on humans by showing apparent recovery from the impact of maternal  
399 loss on cortisol secretion profiles. This suggests that the biological embedding model proposed for  
400 humans may not apply to certain wild-living long-lived species, that prolonged alteration of the  
401 HPA axis functioning may not be viable in these species (Boonstra 2012; Dantzer et al. 2016;  
402 Beehner & Bergman 2017), and/or that access to buffering mechanisms alleviate the effect of early  
403 life adversity on cortisol profiles. In humans, orphans who did not have access to buffering  
404 mechanisms during childhood (such as placement in foster care family) present altered cortisol  
405 profiles as adults (Gunnar et al. 2001). Survival into adulthood for these human orphans, despite  
406 their altered physiology, may be enabled by access to societal systems such as medical care. Such  
407 systems are absent in non-human animals. The absence of altered cortisol profiles in adult orphan  
408 chimpanzees (our study) and baboons (Rosenbaum et al. 2020) suggest that the selective pressure  
409 for these orphans, and possibly for orphans in other wild long-lived non-human animal species, to  
410 return to regular HPA axis functioning, via buffering or other mechanisms, may be stronger than  
411 in humans.

412 There is much interest in linking proximate physiological responses to early life adversity to  
413 ultimate long-term fitness consequences (Dantzer et al. 2016). Whether and how the effect of

414 maternal loss on immature, but not mature, cortisol profiles in wild chimpanzees contributes to the  
415 long-lasting negative impacts on their fitness (Walker et al. 2018; Crockford et al. 2020) remains  
416 to be established. In general, future studies on wild mammals should link the effects of early life  
417 adversity on an individual's physiology to long-term fitness consequences to understand better the  
418 selection forces at play. An investigation of the physiological and social differences, between  
419 orphans who do survive and those who do not reach maturity, as well as identifying and  
420 quantifying the effects of the buffering mechanisms that contribute to these differences, will be  
421 key in this process.

422

## 423 **Material and Methods**

### 424 *Study communities*

425 We used the long-term data of the Tai Chimpanzee Project (Wittig & Boesch 2019b) collected on  
426 four communities of wild Western chimpanzees (East, North, Middle, and South) in the Tai  
427 National Park, Cote d'Ivoire (5°52'N, 7°20'E). The behavioural observation of the chimpanzees  
428 started in 1982 and is still ongoing. The observation periods for each of the communities are as  
429 follows: North 1982-present; South, 1993-present; Middle, 1995-2004; East, 2000-present (Wittig  
430 2018). Urine samples were collected regularly in all communities from 2000 onwards except for  
431 the East community where sample collection started in 2003.

### 432 *Study subjects*

433 For this study, we considered all immature individuals from both sexes (< 12 years of age) and  
434 mature males (>= 12 years of age) from whom urine samples were collected. The age range for  
435 immatures sampled in this study were 2.82-11.99 years for non-orphans and 4.10-11.99 years for

436 orphans. Physical maturity may come later in male Tai chimpanzees but 12 years is the age at  
437 which chimpanzees range predominantly independently of their mother (Tai Chimpanzee Project,  
438 unpublished data) and are fully integrated in the male hierarchy (Mielke et al. 2018. We excluded  
439 mature females from the analysis since most females in our study immigrated from unhabituated  
440 communities into the study communities, which meant we had no knowledge of the presence or  
441 absence of their mothers during their immature years. We excluded orphans for whom the date of  
442 death of the mother was unknown (e.g. occurred before habituation of the study community). For  
443 individual samples, we excluded outliers (i.e. samples with very low or very high hormonal  
444 measures, see details in supplementary material) and samples collected when the individuals were  
445 sick. We also ensured that the final data set comprised at least three data points per individual per  
446 year and that the earliest and the latest samples were separated by at least 6 hours, to ensure a  
447 meaningful evaluation of the diurnal cortisol slope of each individual (see details in supplementary  
448 material). In total, we used 849 samples from 50 immatures, including 17 orphans (N samples per  
449 individual mean  $\pm$  se = 17.0 $\pm$ 2.2) and 2184 samples from 28 mature males, including 11 orphans  
450 (N samples per individual mean  $\pm$  se = 78  $\pm$  13.5).

451

#### 452 *Demographic and behavioural data collection*

453 In Tai each chimpanzee community is followed daily by a joint effort of local and international  
454 assistants and researchers (Wittig & Boesch 2019b). Each day, the observers conducted focal  
455 follows from and to sleeping sites. The focal individual was either followed all day (i.e. 12 hours)  
456 or the identity of the focal changed around 12h30 and two different individuals were followed each  
457 day one after the other (i.e. 6h focal follow each). The observer recorded detailed focal and *ad-*

458 *libitum* behavioural data (Altmann 1974). Observers recorded all social interactions such as  
459 aggression and submissive behaviours, which we then used to build a dominance hierarchy (see  
460 below). In addition, each day, the observers recorded, the presence of all individual chimpanzees  
461 they encountered, which provides a detailed account of the demography of each community.  
462 Specifically, we obtained detailed information on individuals' date of birth,  
463 immigration/emigration, and death or disappearance. This information was used to determine the  
464 early life history of the study subject, namely if their mother died before they reached 12 years of  
465 age, and, if so, the age of the subject when its mother died.

#### 466 *Assessment of dominance hierarchy in mature males*

467 Since dominance rank may correlate with the cortisol levels of adult male chimpanzees (e.g. Muller  
468 & Wrangham 2004) we wanted to control for this parameter in our analysis of cortisol patterns in  
469 adult males. We calculated the dominance hierarchy for mature males in each of the study  
470 communities using a modified version of the Elo-rating method (Neumann et al. 2011) developed  
471 by Foester et al. (2016). In this modified version, the  $k$  parameters and the starting score of each  
472 individual are optimised using maximum likelihood approximation (Mielke et al. 2018, see details  
473 in supplementary material). We used all of the long-term data available on unidirectional  
474 submissive pant-grunt vocalizations, given by the lower ranking of the two individuals towards  
475 the higher ranking (Bygott 1979). We used 9,189 pant-grunt recorded for males in Taï South, 3,952  
476 in Taï East, 5,784 in Taï North, and 111 in Taï Middle. All Elo-rating scores were standardized  
477 between 0 and 1 with 1 being the highest-ranking individual and 0 the lowest ranking on any given  
478 day. We then extracted the Elo-rating score of each individual on the day when each urine sample  
479 was collected.

480 *Urine sample collection and analysis*

481 During chimpanzee follows, we collected urine samples opportunistically from known individuals.  
482 Directly after urination, we collected the urine from leaves and/or the ground into a 2ml cryo vial  
483 using a disposable plastic pipette. Within 12 hours of collection, we placed these vials in liquid  
484 nitrogen. Subsequently, the samples were shipped on dry ice to the Endocrinology Laboratory of  
485 the Max Plank Institute for Evolutionary Anthropology in Leipzig, Germany, and stored at -80 °C  
486 until analysis. We used liquid chromatography mass spectrometry (LCMS, Hauser et al. 2008;  
487 Murtagh et al. 2013) and MassLynx (version 4.1; QuanLynx-Software) to quantify cortisol  
488 concentrations in each sample. For all samples analysed before September 2016, we corrected  
489 cortisol levels using prednisolone (hereafter the “old” method). Between September 2016 and June  
490 2019, we corrected cortisol levels using cortisol d4 (hereafter the “new” method). To adjust for  
491 water content in the urine (i.e. urine concentration) we measured, for each sample, its specific  
492 gravity (SG) using a refractometer (TEC, Ober-Ramstadt, Germany). We corrected our cortisol  
493 concentration for urine water content in each sample using the following formula provided by  
494 Miller et al. 2004:

495 
$$\text{SG corrected cortisol} = \text{raw cortisol concentration (ng /ml)} \times \frac{(\text{SG}_{\text{population mean}} - 1.0)}{(\text{SG}_{\text{sample}} - 1.0)}$$

496  
497 where  $\text{SG}_{\text{population mean}}$  is the mean SG value average across all the samples used in this study and  
498  $\text{SG}_{\text{sample}}$  is the SG value of each given sample. In the manuscript, all cortisol concentrations are  
499 reported as ng/ml SG.

500 *Statistical analysis*

501 We used a series of Linear Mixed Models (LMMs) to test our predictions regarding the effect of  
502 maternal loss on chimpanzee overall cortisol levels and diurnal slopes separately in immature  
503 males and females (Model 1a and 1b) and mature males (Model 2a and 2b). In all the models, each  
504 urine sample represented a data point and the cortisol concentration of the sample (expressed in  
505 ng/ml SG) was the response variable. We log-transformed the cortisol values to achieve a  
506 symmetric distribution of the response.

### 507 *Effect of maternal loss on cortisol profiles in immatures*

508 In the first “immature” model (Model 1a), we tested the prediction that immature orphans will  
509 have higher overall cortisol levels and a flatter slope of diurnal cortisol slope when compared to  
510 non-orphans. We fitted a LMM with the orphan status (i.e. “no” if the mother of the individual  
511 was still alive on the day when the sample was collected and “yes” if the mother had died) as our  
512 test predictor to test for the effect of maternal loss on overall cortisol levels. In addition, to test for  
513 the effect of orphan status on the diurnal cortisol variation, we incorporated the linear and quadratic  
514 terms for time of sample collection as test predictors. Both the linear and quadratic terms for time  
515 of sample collection were included in interaction with orphan status into the model to test whether  
516 the diurnal cortisol slope differed between orphans and non-orphans. The time of sample collection  
517 was expressed in minutes with 0 being midnight and 720 being noon. In addition, in this model,  
518 we used the following control predictors: sex of the individual, community size, sex ratio of mature  
519 individuals in the community, age of the individual since this can influence the cortisol levels of  
520 immature chimpanzees (Tkaczynski et al. 2020), the LCMS method used (“old” or “new” method,  
521 see the *urine analysis* section). Community ID was not included as a control predictor in our  
522 analysis since it was highly correlated with community size. In addition, we accounted for seasonal  
523 variation in ecological conditions (e.g. rainfall, temperature, food availability) which can affect

524 cortisol levels in chimpanzees (Wessling et al. 2018; Preis et al. 2019; Samuni et al. 2019) by  
525 converting the Julian date at which samples were collected into a circular variable and including  
526 the sine and cosine of this variable in our model (Wessling et al. 2018).

527 *Effect of age at mother's death and time since mother died on cortisol profile in orphan immatures*

528 In the second “immature model” (Model 1b), we focused on individuals who were orphans at the  
529 time of sampling in order to investigate more specifically the effects of the age at maternal loss,  
530 and years since maternal loss on cortisol levels. We tested the predictions that a) immature  
531 individuals who were orphaned at a younger age would have higher cortisol levels and flatter  
532 diurnal cortisol slopes and b) that, if some form of recovery occurs, these effects will be weaker  
533 the longer time has passed since an individual lost its mother. We incorporated two test predictors  
534 in Model 1b, the age at which the individuals have been orphaned (in days since their date of birth)  
535 and the time since the individuals have been orphaned (in days since the date their mother died).  
536 As in Model 1a, we incorporated the four interaction terms between these two test predictors and  
537 the linear and quadratic terms for time of sample collection. As before, we also incorporated  
538 individual sex, community size, sex ratio, and LCMS method, and the sine and cosine of the Julian  
539 date as control fixed effect. Initially, we also wanted to incorporate the age of the individual at the  
540 time of sampling into Model 1b. This was however not possible due to collinearity between the  
541 individual age at sample and both the age at which the individual was orphaned and the time since  
542 its mother died (i.e. the model did not run due to collinearity issues). To ensure that the results of  
543 Model 1b were not driven by the age at which the individual was sampled we ran an additional  
544 model (Model 1c) to investigate the relationship between individual age and cortisol levels and  
545 diurnal cortisol variation in non-orphan immatures. By doing so we could determine whether age-  
546 related changes in cortisol levels are expected to account for the patterns observed in Model 1b. In



547 Model 1c, the cortisol level of each sample was the response variable and we used the age of the  
548 individual when the sample was collected as test predictor. As previously, we incorporated two  
549 interaction terms in the model between age and the linear and quadratic terms for time of day to  
550 test for the effect of age on cortisol levels and diurnal cortisol slopes. In addition, we also  
551 incorporated in Model 1c individual sex, community size, sex ratio, and LCMS method and the  
552 sine and cosine of the Julian date (i.e. seasonality) as control fixed effect.

553 *Effect of maternal loss on cortisol profiles in mature males*

554 In the first “mature male” model (Model 2a), we tested whether mature males ( $\geq 12$  years) who  
555 were orphaned as immatures (i.e. before 12 years of age) had overall higher cortisol levels and a  
556 flatter diurnal cortisol slope than mature males who did not lose their mother before 12 years of  
557 age. We fitted a LMM with the early life orphan status (i.e. “no”, if the mother of the individual  
558 was still alive when the individual reached 12 years of age, and “yes” if the mother died before the  
559 individual was 12 years of age) as our test predictor. As in Model 1a, we incorporated two  
560 interaction terms between orphan status and the linear and quadratic terms for time of sample  
561 collection. As in the other models, we used community size, the sex ratio, the age of the individual,  
562 the LCMS method, and the sine and cosine of the Julian date as control fixed factors. In addition,  
563 we controlled for the dominance rank of the individual by adding the standardised Elo-rating score  
564 of each individual on the day the sample was collected as a fixed factor into the model.

565 *Effect of age at mother’s death on cortisol profile in orphan immatures*

566 In the second “mature male” model (Model 2b) we assessed whether the age at which the orphan  
567 male chimpanzees lost their mother impacted the diurnal cortisol levels and slopes of mature males  
568 (i.e. whether the potential effect of early life adversity continued into adulthood). Accordingly, we

569 fitted a LMM with “age at which mother died” as a test predictor and its interaction with the linear  
570 and quadratic terms for time of day. In this model, we used only samples collected from mature  
571 males who lost their mothers before they were 12 years of age. As previously, we used community  
572 size, the sex ratio, the age of the individual, the LCMS method, and the sine and cosine of the  
573 Julian date as control fixed effects.

574 In addition to the fixed effects, in all of the LMMs we included individual identity as a random  
575 factor to avoid pseudoreplication. To control for the changes in cortisol diurnal slope with age, we  
576 built one slope per individual per year into each model by incorporating as random factor a dummy  
577 variable “individual\_year”. In addition, since certain years might have particularly harsh or  
578 favourable ecological conditions, and since this can affect cortisol levels in primates (e.g. Young  
579 et al. 2019), we also included year as a random factor in each model. Finally, our hormonal dataset  
580 included samples collected by different observers with different research interests (hereafter  
581 project). Thus, to account for potential variation in cortisol levels that may be a result of inter-  
582 observer variation in the focus of research, we added the ‘project’ type as an additional random  
583 factor.

584 All analyses were conducted in R 3.6.2 (R Core Team 2018) using the function *lmer* from the  
585 package “lme4” (Bates et al. 2015). In each model, we included the maximal random slope  
586 structure between each fixed predictor (test and control) and each random effect (Baayen et al.  
587 2008; Barr et al. 2013) but not the correlation between intercept and slopes. In particular, the linear  
588 and quadratic terms for time of day were included as random slopes within each of the random  
589 effects. In each model, we tested for the overall significance of the test predictors by comparing  
590 the full model to a null model comprising all control predictors, all the random effects, and random  
591 slopes but without the test predictors. We tested each full model against its corresponding null

592 model using a Likelihood Ratio Test (LRT, Dobson 2002). We then assessed the significance of  
593 each predictor variable using a LRT between the full model and a reduced model comprising all  
594 the variables except the one to evaluate. This process was repeated across all variables, one by  
595 one, using the *drop1* function of the “lme4” package. If the LRT revealed that one interaction had  
596 a p-value > 0.05, we reran the model without this interaction and reassessed the significance of all  
597 the predictors.

598 Before fitting each model, we tested for collinearity issues between our predictor variables by  
599 computing the variance inflation factor (VIF) using the function *vif* from the package “car” (Fox  
600 & Weisberg 2011). Collinearity was not an issue in any of the final models (VIF of all predictor  
601 variables < 3.6). We also assessed model stability by removing one level of each random effect at  
602 a time and recalculating the estimates of the different predictors which revealed that the results  
603 were stable. For each model, we calculated the marginal  $R^2$  (i.e. the variance explained by the  
604 fixed effects) and the conditional  $R^2$  (i.e. the variance explained by the entire model including both  
605 fixed and random effects) using the function *r.squaredGLMM* of the package “MuMin” (Barton  
606 2020).

607

## 608 **Acknowledgments**

609

610 We thank the Ministère de l’Enseignement Supérieur et de la Recherche Scientifique and the  
611 Ministère de Eaux et Forêts in Côte d’Ivoire, and the Office Ivoirien des Parcs et Réserves for  
612 permitting the study. We are grateful to the Centre Suisse de Recherches Scientifiques en Côte  
613 d’Ivoire and the staff members of the Taï Chimpanzee Project for their support and collecting the

614 data. This study was funded by the Max Planck Society and the European Research Council (ERC)  
615 under the European Union's Horizon 2020 research and innovation program awarded to C.C.  
616 (grant agreement no. 679787). Core funding for the Tai Chimpanzee Project has been provided by  
617 the Max Planck Society since 1997.

618

619

620

621

622

623

624

625

626

627

628

629

630

631

632

633 **Bibliography**

- 634 **Altmann, J.** 1974. Observational study of behavior: sampling methods. *Behaviour*, **49**, 227–267.
- 635 **Andres, D., Clutton-Brock, T. H., Kruuk, L. E. B., Pemberton, J. M., Stopher, K. V. & Ruckstuhl, K. E.**  
636 2013. Sex differences in the consequences of maternal loss in a long-lived mammal, the red deer (*Cervus*  
637 *elaphus*). *Behavioral Ecology and Sociobiology*, **67**, 1249–1258.
- 638 **Baayen, R. H., Davidson, D. J. & Bates, D. M.** 2008. Mixed-effects modeling with crossed random effects  
639 for subjects and items. *Journal of Memory and Language*, **59**, 390–412.
- 640 **Barr, D. J., Levy, R., Scheepers, C. & Tily, H. J.** 2013. Random effects structure for confirmatory  
641 hypothesis testing: Keep it maximal. *Journal of Memory and Language*, **68**, 255–278.
- 642 **Barton, R. N.** 1987. 6 - The neuroendocrinology of physical injury. *Baillière's Clinical Endocrinology and*  
643 *Metabolism*, **1**, 355–374.
- 644 **Barton, K.** 2020. MuMIn: Multi-Model Inference. R package version 1.43.17. [https://CRAN.R-](https://CRAN.R-project.org/package=MuMIn)  
645 [project.org/package=MuMIn](https://CRAN.R-project.org/package=MuMIn).
- 646 **Bates, D., Mächler, M., Bolker, B. & Walker, S.** 2015. Fitting Linear Mixed-Effects Models using lme4.  
647 *Journal of Statistical Software*, **67**, 1–48.
- 648 **Beehner, J. C. & Bergman, T. J.** 2017. The next step for stress research in primates: To identify  
649 relationships between glucocorticoid secretion and fitness. *Hormones and Behavior*, **91**, 68–83.
- 650 **Behringer, V., Preis, A., Wu, D. F., Crockford, C., Leendertz, F. H., Wittig, R. M. & Deschner, T.** 2020.  
651 Urinary Cortisol Increases During a Respiratory Outbreak in Wild Chimpanzees. *Frontiers in Veterinary*  
652 *Science*, **7**,
- 653 **Berens, A. E., Jensen, S. K. G. & Nelson, C. A.** 2017. Biological embedding of childhood adversity: from  
654 physiological mechanisms to clinical implications. *BMC Medicine*, **15**, 135.
- 655 **Bernard, K., Zwerling, J. & Dozier, M.** 2015. Effects of early adversity on young children's diurnal cortisol  
656 rhythms and externalizing behavior. *Developmental Psychobiology*, **57**, 935–947.
- 657 **Boesch, C. & Boesch-Achermann, H.** 2000. *The chimpanzees of the Tai forest: behavioural ecology and*  
658 *evolution*. Oxford: Oxford University Press.
- 659 **Boesch, C., Bole, C., Eckhardt, N. & Boesch, H.** 2010. Altruism in forest chimpanzees: The case of  
660 adoption. *Plos One*, **5**, e8901.
- 661 **Boonstra, R.** 2012. Reality as the leading cause of stress: rethinking the impact of chronic stress in  
662 nature. *Functional Ecology*,
- 663 **Botero, M., MacDonald, S. E. & Miller, R. S.** 2013. Anxiety-related behavior of orphan chimpanzees (*Pan*  
664 *trogloodytes schweinfurthii*) at Gombe National Park, Tanzania. *Primates*, **54**, 21–26.

- 665 **Butler, K., Klaus, K., Edwards, L. & Pennington, K.** 2017. Elevated cortisol awakening response  
666 associated with early life stress and impaired executive function in healthy adult males. *Hormones and*  
667 *Behavior*, **95**, 13–21.
- 668 **Bygott, J.** 1979. Agonistic behaviour, dominance, and social structure in wild chimpanzees of the Gombe  
669 National Park. *The great apes*, 405–428.
- 670 **Carlson, M. & Earls, F.** 1997. Psychological and neuroendocrinological sequelae of early social  
671 deprivation in institutionalized children in Romania. *Annals of the New York Academy of Sciences*, **807**,  
672 419–428.
- 673 **Cicchetti, D. & Rogosch, F. A.** 2001. Diverse patterns of neuroendocrine activity in maltreated children.  
674 *Development and Psychopathology*, **13**, 677–693.
- 675 **Clark, C.** 1977. A preliminary report on weaning among Chimpanzees of the Gombe National Park,  
676 Tanzania. *Primate bio-social development*,
- 677 **Clow, A., Thorn, L., Evans, P. & Hucklebridge, F.** 2004. The awakening cortisol response: Methodological  
678 issues and significance. *Stress*, **7**, 29–37.
- 679 **Clutton-Brock, T. H.** 2016. *Mammal Societies*. Chichester, UK: John Wiley & Sons.
- 680 **Crockford, C., Samuni, L., Vigilant, L. & Wittig, R. M.** 2020. Postweaning maternal care increases male  
681 chimpanzee reproductive success. *Science Advances*, **6**, eaaz5746.
- 682 **Danese, A., Caspi, A., Williams, B., Ambler, A., Sugden, K., Mika, J., Werts, H., Freeman, J., Pariante, C.**  
683 **M., Moffitt, T. E. & Arseneault, L.** 2011. Biological embedding of stress through inflammation processes  
684 in childhood. *Molecular Psychiatry*, **16**, 244–246.
- 685 **Dantzer, B., Westrick, S. E. & van Kesteren, F.** 2016. Relationships between endocrine traits and life  
686 histories in wild animals: Insights, problems, and potential pitfalls. *Integrative and Comparative Biology*,  
687 **56**, 185–197.
- 688 **Dobson, A. J.** 2002. *An Introduction to the Generalized Linear Models, 2nd edn*. Boca Raton, FL: Chapman  
689 and Hall/CRC Press.
- 690 **Doman, J., Thompson, S., Grochocinski, V., Jarrett, D. & Kupfer, D. J.** 1986. A computer algorithm to  
691 determine the nadir and rise time in nocturnal cortisol secretion. *Psychoneuroendocrinology*, **11**, 359–  
692 366.
- 693 **Dozier, M., Manni, M., Gordon, M. K., Peloso, E., Gunnar, M. R., Stovall-McClough, K. C., Eldreth, D. &**  
694 **Levine, S.** 2006. Foster children's diurnal production of cortisol: An exploratory study. *Child*  
695 *Maltreatment*, **11**, 189–197.
- 696 **Ehrlich, K. B., Ross, K. M., Chen, E. & Miller, G. E.** 2016. Testing the biological embedding hypothesis: Is  
697 early life adversity associated with a later proinflammatory phenotype? *Development and*  
698 *psychopathology*, **28**, 1273–1283.

- 699 **Emery Thompson, M., Muller, M. N., Kahlenberg, S. M. & Wrangham, R. W.** 2010. Dynamics of social  
700 and energetic stress in wild female chimpanzees. *Hormones and Behavior*, **58**, 440–449.
- 701 **Emery Thompson, M., Fox, S. A., Berghänel, A., Sabbi, K. H., Phillips-Garcia, S., Enigk, D. K., Otali, E.,**  
702 **Machanda, Z. P., Wrangham, R. W. & Muller, M. N.** 2020. Wild chimpanzees exhibit humanlike aging of  
703 glucocorticoid regulation. *Proceedings of the National Academy of Sciences*, **117**, 8424–8430.
- 704 **Foerster, S., Franz, M., Murray, C. M., Gilby, I. C., Feldblum, J. T., Walker, K. K. & Pusey, A. E.** 2016.  
705 Chimpanzee females queue but males compete for social status. *Scientific Reports*, **6**, 35404.
- 706 **Foster, E. A., Franks, D. W., Mazzi, S., Darden, S. K., Balcomb, K. C., Ford, J. K. B. & Croft, D. P.** 2012.  
707 Adaptive prolonged postreproductive life span in killer whales. *Science*, **337**, 1313–1313.
- 708 **Fox, J. & Weisberg, S.** 2011. *An {R} Companion to Applied Regression, Second Edition*. Thousand Oaks CA  
709 edn. Sage.
- 710 **Frank, D. A., Klass, P. E., Earls, F. & Eisenberg, L.** 1996. Infants and young children in orphanages: One  
711 view from pediatrics and child psychiatry. *Pediatrics*, **97**, 569–578.
- 712 **Garcia-Belenguier, S., Oliver, C. & Morméde, P.** 1993. Facilitation and feedback in the Hypothalamo-  
713 Pituitary-Adrenal axis during food restriction in rats. *Journal of Neuroendocrinology*, **5**, 663–668.
- 714 **Girard-Buttoz, C., Heistermann, M., Krummel, S. & Engelhardt, A.** 2009. Seasonal and social influences  
715 on fecal androgen and glucocorticoid excretion in wild male long-tailed macaques (*Macaca fascicularis*).  
716 *Physiology & Behavior*, **98**, 168–175.
- 717 **Goldenberg, S. Z. & Witemyer, G.** 2017. Orphaned female elephant social bonds reflect lack of access  
718 to mature adults. *Scientific Reports*, **7**, 1–7.
- 719 **Gonzalez, A., Jenkins, J. M., Steiner, M. & Fleming, A. S.** 2009. The relation between early life adversity,  
720 cortisol awakening response and diurnal salivary cortisol levels in postpartum women.  
721 *Psychoneuroendocrinology*, **34**, 76–86.
- 722 **Goodall, J.** 1986. *The Chimpanzees of Gombe: Patterns of Behavior*. Cambridge, Mass: Harvard  
723 University Press.
- 724 **Goodwin, G. M., Fairburn, C. G., Keenan, J. C. & Cowen, P. J.** 1988. The effects of dieting and weight  
725 loss upon the stimulation of thyrotropin (TSH) by thyrotropin-releasing hormone (TRH) and suppression  
726 of cortisol secretion by dexamethasone in men and women. *Journal of Affective Disorders*, **14**, 137–144.
- 727 **Grossman, C. J.** 1985. Interactions between the gonadal steroids and the immune system. *Science*, **227**,  
728 257–261.
- 729 **Gunnar, M. R., Morison, S. J., Chisholm, K. & Schuder, M.** 2001. Salivary cortisol levels in children  
730 adopted from Romanian orphanages. *Development and Psychopathology*, **13**, 611–628.
- 731 **Hart, J., Gunnar, M. & Cicchetti, D.** 1996. Altered neuroendocrine activity in maltreated children related  
732 to symptoms of depression. *Development and Psychopathology*, **8**, 201–214.

- 733 **Hauser, B., Deschner, T. & Boesch, C.** 2008. Development of a liquid chromatography–tandem mass  
734 spectrometry method for the determination of 23 endogenous steroids in small quantities of primate  
735 urine. *Journal of Chromatography B*, **862**, 100–112.
- 736 **Heim, C. & Nemeroff, C. B.** 2001. The role of childhood trauma in the neurobiology of mood and anxiety  
737 disorders: preclinical and clinical studies. *Biological Psychiatry*, **49**, 1023–1039.
- 738 **Hobaiter, C., Schel, A. M., Langergraber, K. & Zuberbühler, K.** 2014. ‘Adoption’ by maternal siblings in  
739 wild chimpanzees. *PLOS ONE*, **9**, e103777.
- 740 **Karlamangla, A. S., Merkin, S. S., Almeida, D. M., Friedman, E. M., Mogle, J. A. & Seeman, T. E.** 2019.  
741 Early-life adversity and dysregulation of adult diurnal cortisol rhythm. *The Journals of Gerontology:*  
742 *Series B*, **74**, 160–169.
- 743 **Kaufman, J.** 1991. Depressive disorders in maltreated children. *Journal of the American Academy of*  
744 *Child & Adolescent Psychiatry*, **30**, 257–265.
- 745 **Kawai, T., Kuwano, Y., Masuda, K., Fujita, K., Tanaka, H., Nishikawa, T., Rokutan, K. & Nishida, K.** 2017.  
746 Adverse parenting is associated with blunted salivary cortisol awakening response and altered  
747 expression of glucocorticoid receptor  $\beta$  and  $\beta$ 2-adrenergic receptor mRNAs in leukocytes in Japanese  
748 medical students. *Stress (Amsterdam, Netherlands)*, **20**, 159–166.
- 749 **Kudielka, B. M., Bellingrath, S. & Hellhammer, D. H.** 2006. Cortisol in burnout and vital exhaustion: an  
750 overview. *Giornale Italiano Di Medicina Del Lavoro Ed Ergonomia*, **28**, 34–42.
- 751 **Liu, D., Diorio, J., Tannenbaum, B., Caldji, C., Francis, D., Freedman, A., Sharma, S., Pearson, D.,**  
752 **Plotsky, P. M. & Meaney, M. J.** 1997. Maternal care, hippocampal glucocorticoid receptors, and  
753 Hypothalamic-Pituitary-Adrenal responses to stress. *Science*, **277**, 1659–1662.
- 754 **Maestriperi, D. & Mateo, J. M.** 2009. *Maternal effects in mammals*. Chicago: University of Chicago  
755 Press.
- 756 **McLachlan, K., Rasmussen, C., Oberlander, T. F., Loock, C., Pei, J., Andrew, G., Reynolds, J. &**  
757 **Weinberg, J.** 2016. Dysregulation of the cortisol diurnal rhythm following prenatal alcohol exposure and  
758 early life adversity. *Alcohol*, **53**, 9–18.
- 759 **Meaney, M. J. & Szyf, M.** 2005. Maternal care as a model for experience-dependent chromatin  
760 plasticity? *Trends in Neurosciences*, **28**, 456–463.
- 761 **Meinlschmidt, G. & Heim, C.** 2005. Decreased cortisol awakening response after early loss experience.  
762 *Psychoneuroendocrinology*, **30**, 568–576.
- 763 **Mielke, A., Samuni, L., Preis, A., Gogarten, J. F., Crockford, C. & Wittig, R. M.** 2018. Bystanders  
764 intervene to impede grooming in Western chimpanzees and sooty mangabeys. *Royal Society Open*  
765 *Science*, **4**, 171296.
- 766 **Miller, R. C., Brindle, E., Holman, D. J., Shofer, J., Klein, N. A., Soules, M. R. & O’Connor, K. A.** 2004.  
767 Comparison of specific gravity and creatinine for normalizing urinary reproductive hormone  
768 concentrations. *Clinical Chemistry*, **50**, 924–932.



- 769 **Miller, G. E., Chen, E. & Zhou, E. S.** 2007. If it goes up, must it come down? Chronic stress and the  
770 hypothalamic-pituitary-adrenocortical axis in humans. *Psychological Bulletin*, **133**, 25–45.
- 771 **Miller, G. E., Chen, E., Fok, A. K., Walker, H., Lim, A., Nicholls, E. F., Cole, S. & Kobor, M. S.** 2009. Low  
772 early-life social class leaves a biological residue manifested by decreased glucocorticoid and increased  
773 proinflammatory signaling. *Proceedings of the National Academy of Sciences*, **106**, 14716–14721.
- 774 **Miller, G. E., Chen, E. & Parker, K. J.** 2011. Psychological stress in childhood and susceptibility to the  
775 chronic diseases of aging: Moving toward a model of behavioral and biological mechanisms.  
776 *Psychological Bulletin*, **137**, 959–997.
- 777 **Muehlenbein, M. P. & Watts, D. P.** 2010. The costs of dominance: testosterone, cortisol and intestinal  
778 parasites in wild male chimpanzees. *BioPsychoSocial Medicine*, **4**, 21.
- 779 **Muller, M. N. & Wrangham, R. W.** 2004. Dominance, cortisol and stress in wild chimpanzees (*Pan*  
780 *troglydtes schweinfurthii*). *Behavioral Ecology and Sociobiology*, **55**, 332–340.
- 781 **Murtagh, R., Behringer, V. & Deschner, T.** 2013. LC-MS as a method for non-invasive measurement of  
782 steroid hormones and their metabolites in urine and faeces of animals. *Veterinary Medicine Austria*,  
783 **100**, 247–254.
- 784 **Nakamura, M., Hayaki, H., Hosaka, K., Itoh, N. & Zamma, K.** 2014. Brief communication: Orphaned  
785 male chimpanzees die young even after weaning. *American Journal of Physical Anthropology*, **153**, 139–  
786 143.
- 787 **Neumann, C., Dubocsq, J., Dubuc, C., Ginting, A., Irwan, A. M., Agil, M., Widdig, A. & Engelhardt, A.**  
788 2011. Assessing dominance hierarchies: validation and advantages of progressive evaluation with Elo-  
789 rating. *Animal Behaviour*, **82**, 911–921.
- 790 **Nicolson, N. A.** 2004. Childhood parental loss and cortisol levels in adult men.  
791 *Psychoneuroendocrinology*, **29**, 1012–1018.
- 792 **Power, C. & Hertzman, C.** 1997. Social and biological pathways linking early life and adult disease. *British*  
793 *Medical Bulletin*, **53**, 210–221.
- 794 **Preis, A., Samuni, L., Deschner, T., Crockford, C. & Wittig, R. M.** 2019. Urinary cortisol, aggression,  
795 dominance and competition in wild, West African male chimpanzees. *Frontiers in Ecology and Evolution*,  
796 **7**,
- 797 **Pruessner, J. C., Hellhammer, D. H. & Kirschbaum, C.** 1999. Burnout, perceived stress, and cortisol  
798 responses to awakening. *Psychosomatic Medicine*, **61**, 197.
- 799 **Pusey, A. E.** 1979. Intercommunity transfer of chimpanzees in Gombe National Park. In: *The great apes*,  
800 (Ed. by D. Hamburg & E. McCown), pp. 465–479. California: Cummings.
- 801 **Pusey, A. E.** 1983. Mother-offspring relationships in chimpanzees after weaning. *Animal Behaviour*, **31**,  
802 363–377.

- 803 **R Core Team.** 2018. R: A language and environment for statistical computing. R Foundation for Statistical  
804 Computing, Vienna, Austria.
- 805 **Rasmussen, L. J. H., Moffitt, T. E., Eugen-Olsen, J., Belsky, D. W., Danese, A., Harrington, H., Houts, R.**  
806 **M., Poulton, R., Sugden, K., Williams, B. & Caspi, A.** 2019. Cumulative childhood risk is associated with a  
807 new measure of chronic inflammation in adulthood. *Journal of Child Psychology and Psychiatry*, **60**, 199–  
808 208.
- 809 **Romero, L. M., Dickens, M. J. & Cyr, N. E.** 2009. The reactive scope model - A new model integrating  
810 homeostasis, allostasis, and stress. *Hormones and Behavior*, **55**, 375–389.
- 811 **Rosenbaum, S., Zeng, S., Campos, F. A., Gesquiere, L. R., Altmann, J., Alberts, S. C., Li, F. & Archie, E. A.**  
812 2020. Social bonds do not mediate the relationship between early adversity and adult glucocorticoids in  
813 wild baboons. *Proceedings of the National Academy of Sciences*,
- 814 **Samuni, L., Wittig, R. M. & Crockford, C.** 2019. Adoption in the Taï chimpanzees: costs, benefits and  
815 strong social relationships. In: *The chimpanzees of the taï forest: 40 years of research*, (Ed. by R. M.  
816 Boesch, Christophe, R. M. Wittig, C. Crockford, L. Vigilant, T. Deschner, & F. H. Leendertz), pp. 141–158.  
817 Cambridge, UK: Cambridge University Press.
- 818 **Samuni, L., Preis, A., Deschner, T., Wittig, R. M. & Crockford, C.** 2019. Cortisol and oxytocin show  
819 independent activity during chimpanzee intergroup conflict. *Psychoneuroendocrinology*, **104**, 165–173.
- 820 **Samuni, L., Tkaczynski, P., Deschner, T., Löhrlich, T., Wittig, R. M. & Crockford, C.** 2020. Maternal  
821 effects on offspring growth indicate post-weaning juvenile dependence in chimpanzees (*Pan troglodytes*  
822 *verus*). *Frontiers in Zoology*, **17**, 1.
- 823 **Sánchez, M. M., Ladd, C. O. & Plotsky, P. M.** 2001. Early adverse experience as a developmental risk  
824 factor for later psychopathology: Evidence from rodent and primate models. *Development and*  
825 *Psychopathology*, **13**, 419–449.
- 826 **Sapolsky, R. M.** 2002. Endocrinology of the stress response. In: *Behavioural endocrinology, 2nd edition*,  
827 (Ed. by J. B. Becker, S. M. Breedlove, D. Crews, & M. M. McCarthy), pp. 409–450. Cambridge,  
828 Massachusetts: MIT Press.
- 829 **Sephton, S. E., Sapolsky, R. M., Kraemer, H. C. & Spiegel, D.** 2000. Diurnal cortisol rhythm as a predictor  
830 of breast cancer survival. *JNCI: Journal of the National Cancer Institute*, **92**, 994–1000.
- 831 **Setchell, J. M., Smith, T., Wickings, E. J. & Knapp, L. A.** 2010. Stress, social behaviour, and secondary  
832 sexual traits in a male primate. *Hormones and Behavior*, **58**, 720–728.
- 833 **Slavich, G. M. & Cole, S. W.** 2013. The Emerging Field of Human Social Genomics. *Clinical Psychological*  
834 *Science*, **1**, 331–348.
- 835 **Sonnweber, R., Araya-Ajoy, Y. G., Behringer, V., Deschner, T., Tkaczynski, P., Fedurek, P., Preis, A.,**  
836 **Samuni, L., Zommers, Z., Gomes, C., Zuberbühler, K., Wittig, R. M. & Crockford, C.** 2018. Circadian  
837 rhythms of urinary cortisol levels vary between individuals in wild male chimpanzees: A reaction norm  
838 approach. *Frontiers in Ecology and Evolution*, **6**,

- 839 **Stanton, M. A., Lonsdorf, E. V., Murray, C. M. & Pusey, A. E.** 2020. Consequences of maternal loss  
840 before and after weaning in male and female wild chimpanzees. *Behavioral Ecology and Sociobiology*,  
841 **74**, 22.
- 842 **Strauss, E. D., Shizuka, D. & Holekamp, K. E.** 2020. Juvenile rank acquisition is associated with fitness  
843 independent of adult rank. *Proceedings of the Royal Society B: Biological Sciences*, **287**, 20192969.
- 844 **Surbeck, M., Boesch, C., Crockford, C., Thompson, M. E., Furuichi, T., Fruth, B., Hohmann, G., Ishizuka,**  
845 **S., Machanda, Z., Muller, M. N., Pusey, A., Sakamaki, T., Tokuyama, N., Walker, K., Wrangham, R.,**  
846 **Wroblewski, E., Zuberbühler, K., Vigilant, L. & Langergraber, K.** 2019. Males with a mother living in  
847 their group have higher paternity success in bonobos but not chimpanzees. *Current Biology*, **29**, R354–  
848 R355.
- 849 **Tarullo, A. R. & Gunnar, M. R.** 2006. Child maltreatment and the developing HPA axis. *Hormones and*  
850 *Behavior*, **50**, 632–639.
- 851 **Taylor, S. E., Way, B. M. & Seeman, T. E.** 2011. Early adversity and adult health outcomes. *Development*  
852 *and Psychopathology*, **23**, 939–954.
- 853 **Tkaczynski, P. J., Behringer, V., Ackermann, C. Y., Fedurek, P., Fruth, B., Girard-Buttoz, C., Hobaiter, C.,**  
854 **Lee, S. M., Löhrich, T., Preis, A., Samuni, L., Zommers, Z., Zuberbühler, K., Deschner, T., Wittig, R. M.,**  
855 **Hohmann, G. & Crockford, C.** 2020. Patterns of urinary cortisol levels during ontogeny appear  
856 population specific rather than species specific in wild chimpanzees and bonobos. *Journal of Human*  
857 *Evolution*, **147**, 102869.
- 858 **Tung, J., Archie, E. A., Altmann, J. & Alberts, S. C.** 2016. Cumulative early life adversity predicts  
859 longevity in wild baboons. *Nature Communications*, **7**, 1–7.
- 860 **Uehara, S. & Nyundo, R.** 1983. One observed case of temporary adoption of an infant by unrelated  
861 nulliparous females among wild chimpanzees in the Mahale Mountains, Tanzania. *Primates*, **24**, 456–  
862 466.
- 863 **van Leeuwen, E. J. C., Mulenga, I. C. & Chidester, D. L.** 2014. Early social deprivation negatively affects  
864 social skill acquisition in chimpanzees (*Pan troglodytes*). *Animal Cognition*, **17**, 407–414.
- 865 **Walker, K. K., Walker, C. S., Goodall, J. & Pusey, A. E.** 2018. Maturation is prolonged and variable in  
866 female chimpanzees. *Journal of Human Evolution*, **114**, 131–140.
- 867 **Watts, H. E., Tanner, J. B., Lundrigan, B. L. & Holekamp, K. E.** 2009. Post-weaning maternal effects and  
868 the evolution of female dominance in the spotted hyena. *Proceedings of the Royal Society B: Biological*  
869 *Sciences*, **276**, 2291–2298.
- 870 **Weaver, I. C. G., Cervoni, N., Champagne, F. A., D’Alessio, A. C., Sharma, S., Seckl, J. R., Dymov, S., Szyf,**  
871 **M. & Meaney, M. J.** 2004. Epigenetic programming by maternal behavior. *Nature Neuroscience*, **7**, 847–  
872 854.
- 873 **Weaver, I. C. G., D’Alessio, A. C., Brown, S. E., Hellstrom, I. C., Dymov, S., Sharma, S., Szyf, M. &**  
874 **Meaney, M. J.** 2007. The transcription factor nerve growth factor-inducible protein A mediates

- 875 epigenetic programming: Altering epigenetic marks by immediate-early Genes. *Journal of Neuroscience*,  
876 **27**, 1756–1768.
- 877 **Wessling, E., Deschner, T., Mundry, R., Pruetz, J., Wittig, R. & Kühl, H.** 2018. Seasonal variation in  
878 physiology challenges the notion of chimpanzees (*Pan troglodytes verus*) as a forest-adapted species.  
879 *Frontiers in Ecology and Evolution*, **6**, 60.
- 880 **Wismer Fries, A. B., Shirtcliff, E. A. & Pollak, S. D.** 2008. Neuroendocrine dysregulation following early  
881 social deprivation in children. *Developmental Psychobiology*, **50**, 588–599.
- 882 **Wittig, R. M.** 2018. Tai Chimpanzees. In: *Encyclopedia of Animal Cognition and Behavior*, (Ed. by J. Vonk  
883 & T. K. Shackelford), Cham: Springer International Publishing.
- 884 **Wittig, R. M. & Boesch, C.** 2019a. Demography and life history of five chimpanzee communities in Tai  
885 National Park. In: *The chimpanzees of the tai forest: 40 years of research*, (Ed. by C. Boesch, R. M. Wittig,  
886 C. Crockford, L. Vigilant, T. Deschner, & F. H. Leendertz), pp. 125–140. Cambridge University Press  
887 Cambridge, UK.
- 888 **Wittig, R. M. & Boesch, C.** 2019b. Observation protocol and long-term data collection in Tai. In: *The*  
889 *Chimpanzees of the Tai Forest: 40 Years of Research*, pp. 44–57. Cambridge University Press.
- 890 **Wittig, R. M., Crockford, C., Weltring, A., Deschner, T. & Zuberbuehler, K.** 2015. Single aggressive  
891 interactions increase urinary glucocorticoid levels in wild male chimpanzees. *Plos One*, **10**, e0118695.
- 892 **Wittig, R. M., Crockford, C., Weltring, A., Langergraber, K. E., Deschner, T. & Zuberbühler, K.** 2016.  
893 Social support reduces stress hormone levels in wild chimpanzees across stressful events and everyday  
894 affiliations. *Nature Communications*, **7**,
- 895 **Wroblewski, E. E.** 2008. An unusual incident of adoption in a wild chimpanzee (*Pan troglodytes*)  
896 population at Gombe National Park. *American Journal of Primatology*, **70**, 995–998.
- 897 **Young, E. S., Doom, J. R., Farrell, A. K., Carlson, E. A., Englund, M. M., Miller, G. E., Gunnar, M. R.,**  
898 **Roisman, G. I. & Simpson, J. A.** in press. Life stress and cortisol reactivity: An exploratory analysis of the  
899 effects of stress exposure across life on HPA-axis functioning. *Development and Psychopathology*, 1–12.
- 900 **Young, C., Majolo, B., Heistermann, M., Schülke, O. & Ostner, J.** 2014. Responses to social and  
901 environmental stress are attenuated by strong male bonds in wild macaques. *Proceedings of the*  
902 *National Academy of Sciences*, **111**, 18195–18200.
- 903 **Young, C., Bonnell, T. R., Brown, L. R., Dostie, M. J., Ganswindt, A., Kienzle, S., McFarland, R., Henzi, S.**  
904 **P. & Barrett, L.** 2019. Climate induced stress and mortality in vervet monkeys. *Royal Society Open*  
905 *Science*, **6**, 191078.
- 906 **Zhang, T. Y., Labonté, B., Wen, X. L., Turecki, G. & Meaney, M. J.** 2013. Epigenetic mechanisms for the  
907 early environmental regulation of hippocampal glucocorticoid receptor gene expression in rodents and  
908 humans. *Neuropsychopharmacology*, **38**, 111–123.
- 909

910 **Table 1: Sample size for immature and adult male orphans and non-orphans in each of the 4 study**  
 911 **communities.**

| Community  | Age class   | Orphan status | N. individuals | N. samples | Age range (years) |
|------------|-------------|---------------|----------------|------------|-------------------|
| Tai East   | Immatures   | non-orphans   | 9*             | 113        | 3.8 – 11.9        |
|            |             | orphans       | 10*            | 254        | 4.1 – 11.9        |
|            | Adult males | non-orphans   | 4              | 456        | 13.8 – 40.7       |
|            |             | orphans       | 3              | 354        | 12.3 – 19.8       |
| Tai Middle | Immatures   | non-orphans   |                |            |                   |
|            |             | orphans       |                |            |                   |
|            | Adult males | non-orphans   | 3              | 17         | 17.2 – 33.7       |
|            |             | orphans       |                |            |                   |
| Tai North  | Immatures   | non-orphans   | 11             | 168        | 3.0 – 12.0        |
|            |             | orphans       | 2              | 7          | 10.5 – 11.3       |
|            | Adult males | non-orphans   | 3              | 95         | 12.3 – 20.8       |
|            |             | orphans       | 2              | 61         | 12.1 – 20.4       |
| Tai South  | Immatures   | non-orphans   | 17*            | 173        | 2.8 – 11.9        |
|            |             | orphans       | 5*             | 134        | 4.1– 11.9         |
|            | Adult males | non-orphans   | 7              | 858        | 12.1 – 45.3       |
|            |             | orphans       | 6              | 343        | 12.1 – 21.9       |

912

913 \* 50 immature individuals were included in this study but two immatures in Tai East and two immatures  
 914 in Tai South were sampled before and after their mother died (i.e. they are counted twice in the table, once  
 915 as an orphan and once as a non-orphan). 6 males were included in the study as both mature and immature  
 916 individuals.

917

918

919

920

921

922

923

924

925

926 **Table 2: Results of Model 1a and 1 b**

927 *SE indicates the standard error of the estimate for each predictor. The coded level for each categorical*  
 928 *predictor is indicated in parentheses. Control predictors are italicized. Significant p-value (p<0.05) are*  
 929 *indicated in bold. Cl<sub>low</sub> and Cl<sub>high</sub> indicate the lower and upper limits of the 95% confidence interval for the*  
 930 *estimates of each predictor.*

931 *For Model 1a the full-null model comparison was only a trend ( $\chi^2= 6.67$ , df=3, P=0.083) but since it was*  
 932 *close to the arbitrary significant level of 0.05 we nevertheless present the results of the single predictors*  
 933 *in the table. The detailed results of model 2a and 2b are not presented since the full-null model comparison*  
 934 *was not significant (both P> 0.4).*

935

| Model | Response                               | Predictor                 | Estimate | SE                                       | Cl <sub>low</sub> | Cl <sub>high</sub> | $\chi^2$ | P            |      |              |
|-------|----------------------------------------|---------------------------|----------|------------------------------------------|-------------------|--------------------|----------|--------------|------|--------------|
| 1a    | Log urinary cortisol levels (ng/ml SG) | Intercept                 | 3.70     | 0.20                                     | 3.31              | 4.09               |          |              |      |              |
|       |                                        | Time of the day ^2        | -0.01    | 0.03                                     | -0.07             | 0.04               | 0.24     | 0.623        |      |              |
|       |                                        | Time of the day           | -0.38    | 0.04                                     | -0.45             | -0.31              |          |              |      |              |
|       |                                        | Orphan (yes)              | -0.08    | 0.12                                     | -0.33             | 0.18               |          |              |      |              |
|       |                                        | Sex Ratio                 | 0.05     | 0.06                                     | -0.05             | 0.17               | 0.83     | 0.362        |      |              |
|       |                                        | <i>Community Size</i>     | -0.15    | 0.06                                     | -0.25             | -0.04              | 6.08     | <b>0.014</b> |      |              |
|       |                                        | <i>Sex (male)</i>         | -0.29    | 0.21                                     | -0.73             | 0.11               | 1.83     | 0.176        |      |              |
|       |                                        | <i>Age</i>                | -0.06    | 0.07                                     | -0.21             | 0.08               | 0.72     | 0.397        |      |              |
|       |                                        | <i>LCMS method (old)</i>  | 0.01     | 0.28                                     | -0.52             | 0.56               | 0.00     | 0.969        |      |              |
|       |                                        | <i>Sin(seasonDate)</i>    | -0.07    | 0.03                                     | -0.15             | 0.00               | 5.05     | 0.080        |      |              |
|       |                                        | <i>Cos(seasonDate)</i>    | 0.02     | 0.04                                     | -0.05             | 0.09               |          |              |      |              |
|       |                                        |                           |          | Orphan (yes) : Time of the day           | -0.14             | 0.05               | -0.24    | -0.02        | 5.81 | <b>0.016</b> |
| 1b    | Log urinary cortisol levels (ng/ml SG) | Intercept                 | 3.54     | 0.17                                     | 3.19              | 3.90               |          |              |      |              |
|       |                                        | Years since maternal loss | -0.23    | 0.09                                     | -0.44             | -0.02              | 4.31     | <b>0.038</b> |      |              |
|       |                                        | Age when mother died      | -0.02    | 0.16                                     | -0.66             | -0.15              |          |              |      |              |
|       |                                        | Time of the day           | -0.40    | 0.12                                     | -0.34             | 0.31               |          |              |      |              |
|       |                                        | Time of the day^2         | 0.01     | 0.03                                     | -0.07             | 0.07               |          |              |      |              |
|       |                                        | Sex ratio                 | -0.05    | 0.06                                     | -0.17             | 0.07               | 0.73     | 0.392        |      |              |
|       |                                        | Community size            | -0.05    | 0.06                                     | -0.17             | 0.07               | 0.74     | 0.391        |      |              |
|       |                                        | Sex (Male)                | 0.13     | 0.23                                     | -0.35             | 0.58               | 0.30     | 0.587        |      |              |
|       |                                        | LCMS (old)                | 0.09     | 0.25                                     | -0.42             | 0.58               | 0.10     | 0.756        |      |              |
|       |                                        | sin(seasonDate)           | 0.03     | 0.05                                     | -0.07             | 0.13               | 0.57     | 0.751        |      |              |
|       |                                        | cos(seasonDate)           | 0.03     | 0.05                                     | -0.07             | 0.12               |          |              |      |              |
|       |                                        |                           |          | Age when mother died : Time of the day   | -0.01             | 0.06               | -0.12    | 0.11         | 0.01 | 0.915        |
|       |                                        |                           |          | Age when mother died : Time of the day^2 | -0.08             | 0.04               | -0.16    | -0.01        | 4.73 | <b>0.030</b> |

936

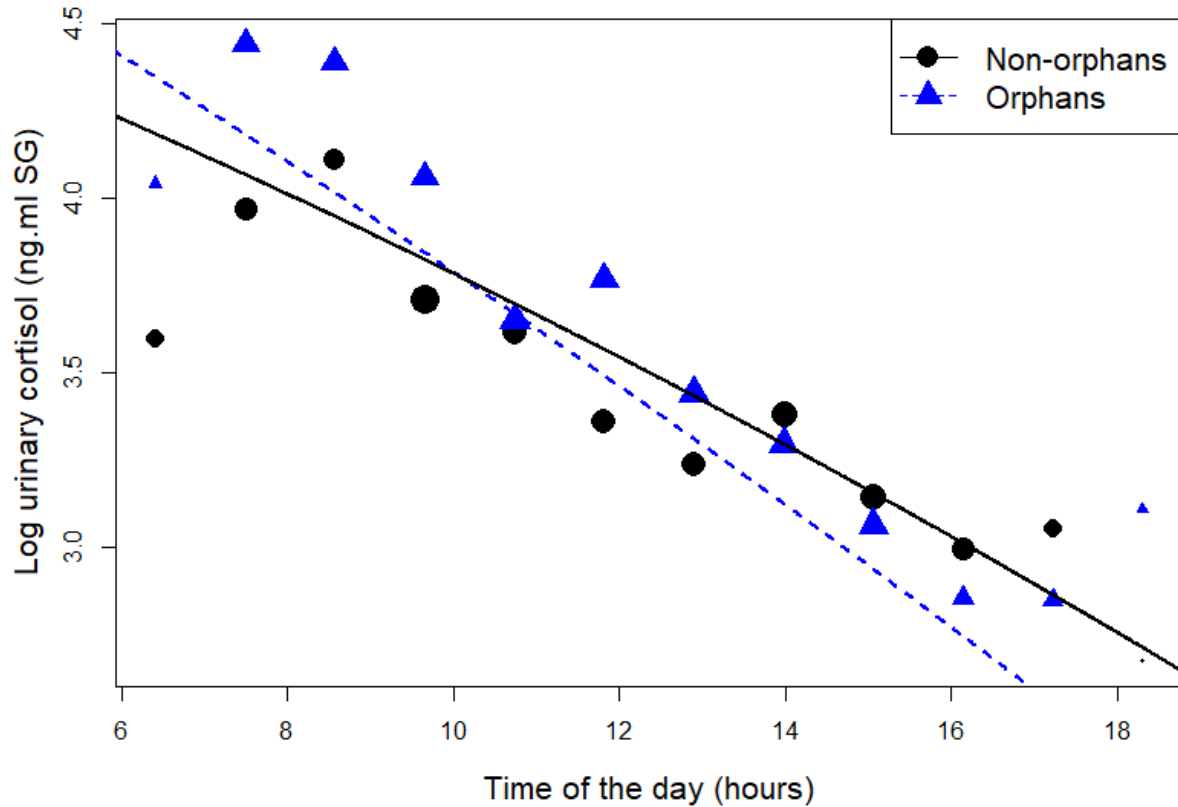

937

938

939

940

941

942 **Figure 1: Effect of maternal loss on daily urinary cortisol level variations in immature chimpanzees.**

943 Orphans are depicted in blue triangles and non-orphans in black circles. The size of the dot is  
944 proportional to the sample size (e.g. the number of data points) contributing to each dot. The blue  
945 dotted line and black solid line depict the prediction lines from Model 1a for orphan and non-orphan  
946 respectively. Note that the full-null model comparison in Model 1a was not significant ( $P=0.083$ ) so the  
947 model lines should be interpreted with caution.

948

949

950

951

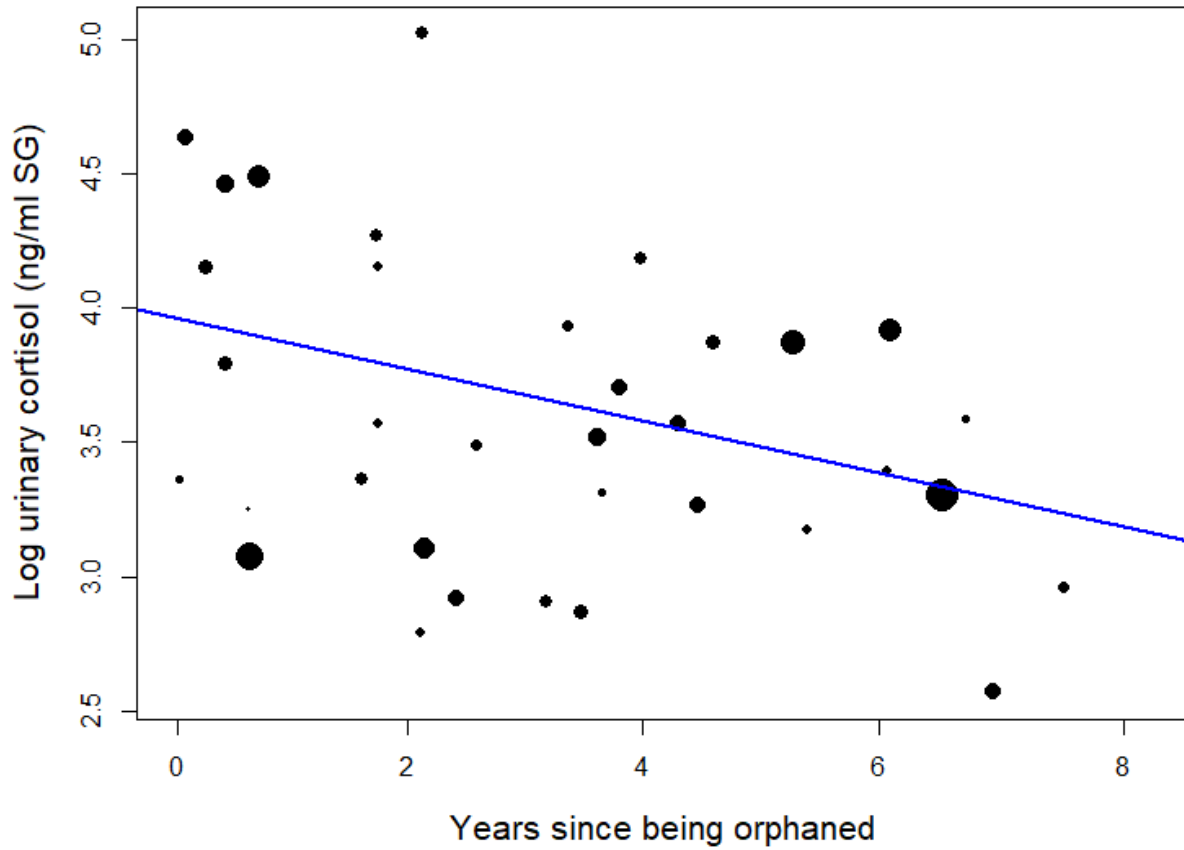

952

953 **Figure 2: Effect of time (in years) since being orphaned on the urinary cortisol levels of immature orphan**

954 **chimpanzees.** Each dot represents each individual each calendar year it has been sampled. The size of the

955 dot is proportional to the sample size (number of urine sample collected) for that individual that year. The

956 blue line indicates the model line (Model 1b).

957

958



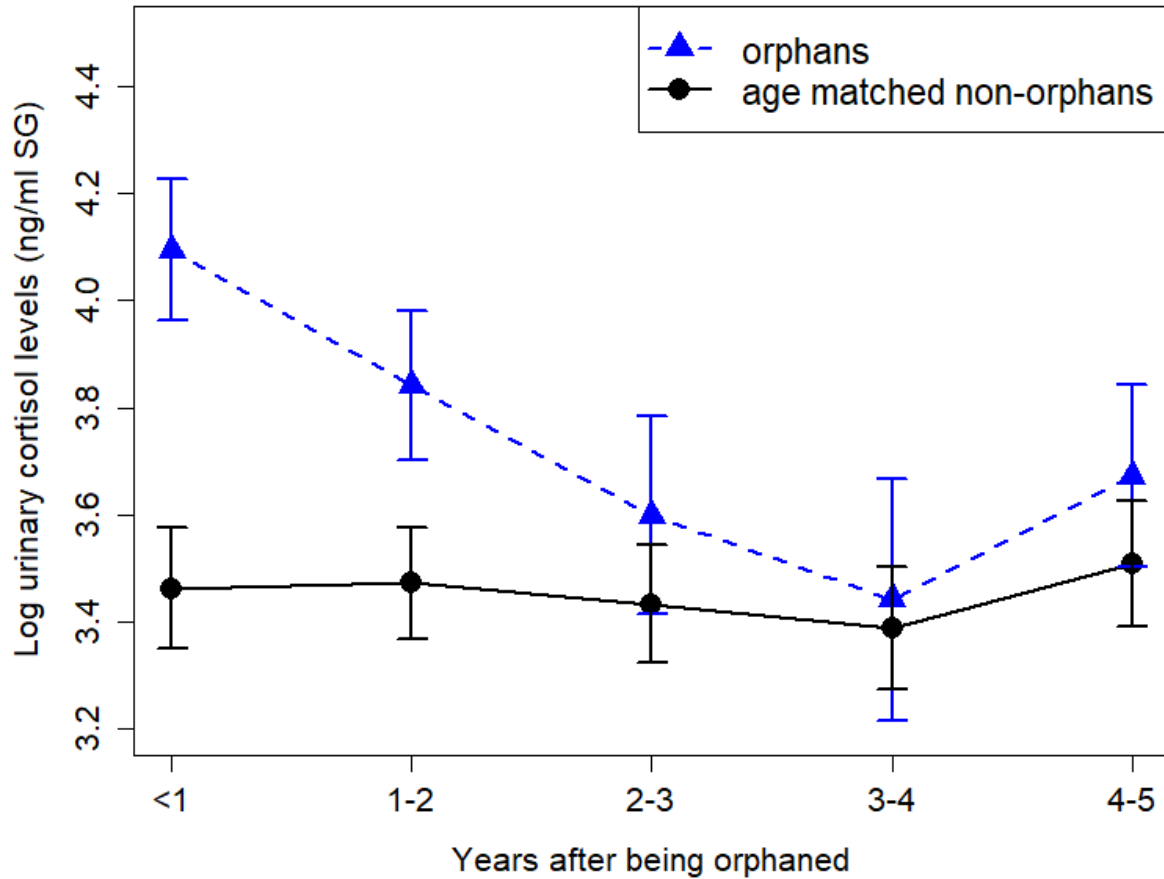

959

960 **Figure 3: Effect of time (in years) since being orphaned on the urinary cortisol levels of immature orphan**  
961 **chimpanzees compared to age-matched non-orphan immatures.**

962 The mean  $\pm$  se is depicted for orphans in blue triangles and for non-orphan in black circles. The non-orphan  
963 pattern indicates the mean urinary cortisol of non-orphan immature who fell into the age range of orphan  
964 immature who have been orphaned for less than a year, 1-2 years, 2-3 years, 3-4 years and 4-5 years  
965 respectively.

966

967

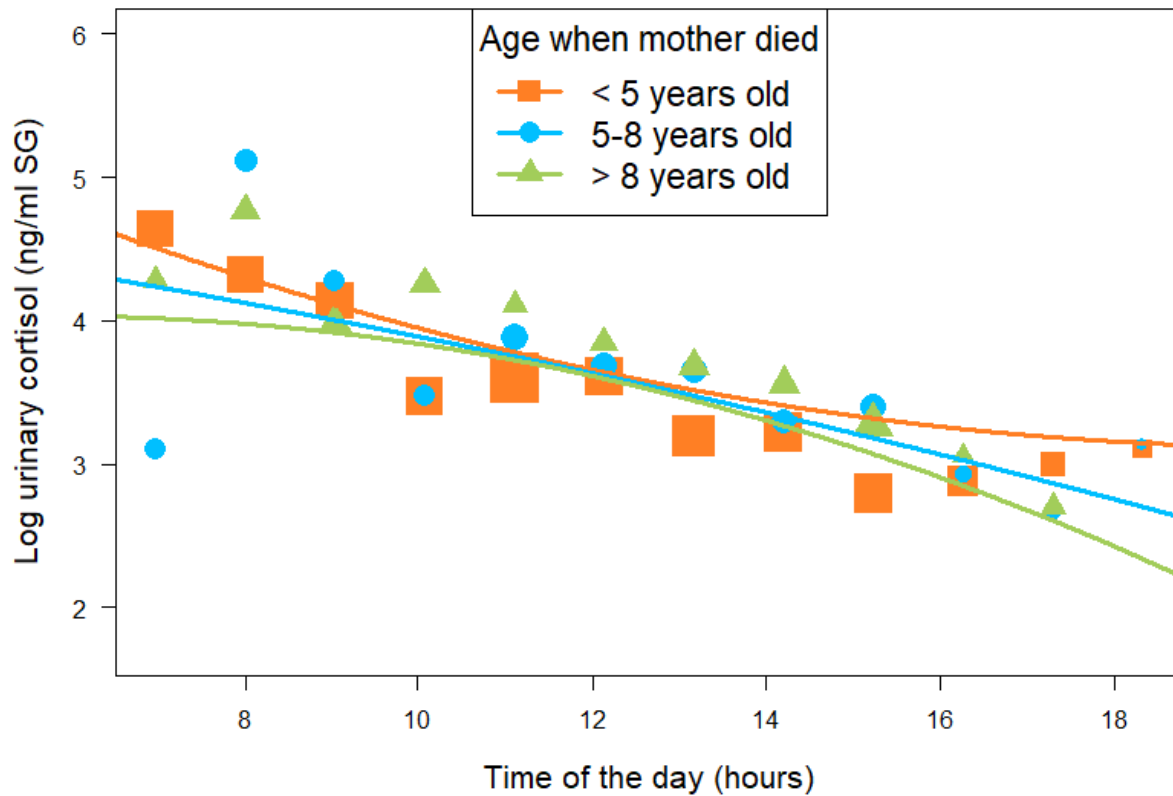

968

969 **Figure 4: Effect of age at which immature orphans lost their mother on diurnal cortisol slopes.**

970 Each dot represents each individual each calendar year it has been sampled. The lines represent the model

971 line predictions (Model 1b). The data points and model line prediction are depicted for immatures who

972 have been orphaned before they were 5 years of age in orange squares, for immatures who have been

973 orphan when they were between 5 and 8 years of age in blue circles, and for immatures who have been

974 orphaned when they were older than 8 years of age in green triangles.

975

976

977

978 **Supplementary material**

979 *Data preparation*

980 The initial dataset comprised 4,604 samples (1,518 from immature individuals and 3,086 from  
981 mature males) from 46 female and 48 male immature individuals and 34 mature males. We applied  
982 a suite of selection criteria to subset our dataset to samples collected from individuals from whom  
983 all demographic and social data needed were available. We excluded all individuals for whom we  
984 could not assess if the mother died before they were 12 years of age or the age they were when  
985 their mother died. We also excluded samples for whom the cortisol concentration could not be  
986 measured or was excessively low ( $<0.1$  ng/ml SG). We excluded samples with very low specific  
987 gravity (SG  $<1.003$ ). Very low SG values are a sign of over diluted samples which reflect potential  
988 contamination with rain water and can, in turn, inflate cortisol concentration measurements. We  
989 also excluded samples collected from individuals on days when they displayed injuries or  
990 symptoms of sickness (as assessed by the on-site veterinary staff) since injury and sickness lead to  
991 extremely elevated cortisol levels in primates (e.g. Barton 1987; Muehlenbein & Watts 2010;  
992 Behringer et al. 2020). Finally, since a large part of our analysis focused on circadian cortisol  
993 variation, we excluded all samples for which we did not have a precise time of collection recorded.  
994 For the same reason, we limited our dataset for each individual to years when at least 3 samples  
995 were collected from this specific individual, and in years in which the earliest and the latest sample  
996 collections were separated in time by at least 6 hours. This criterion was applied in order to be able  
997 to calculate, in our statistical model, a meaningful circadian slope for each individual each year  
998 with time variation representing at least half of the active time of the chimpanzees (i.e. at least 6h  
999 out of 12h). The three samples could have been collected on different days but “time of sample  
1000 collection” was used to define the 6 hour criteria. Following this selection process, we were left

1001 with 849 samples from 50 immatures (including 17 orphans) and 2184 samples from 28 mature  
1002 males (including 11 orphans).

1003

1004

1005

1006

1007

1008

1009

1010

1011

1012

1013

1014

1015

1016

1017

1018

1019 **Table S1: List of orphan immatures in the study and information about the adoption by adult individuals**  
 1020 **in the community.**

| Identity   | Sex | Community | Age when mother died (years) | Adopted? * | Duration of adoption * | N. samples in the study | Age when sampled for the study |
|------------|-----|-----------|------------------------------|------------|------------------------|-------------------------|--------------------------------|
| Beatrice   | F   | East      | 4.9                          | Yes        | > 3 years              | 38                      | 5.3 – 8.6                      |
| Emma       | F   | East      | 4.1                          | Yes        | > 2 years              | 17                      | 4.1 – 6.1                      |
| Eolos      | M   | East      | 3.9                          | Yes        | > 3 years              | 7                       | 7.0 – 7.3                      |
| Erasmus    | M   | East      | 8.7                          | Unknown    |                        | 31                      | 8.8 – 11.8                     |
| Fatima     | F   | East      | 6.6                          | Unknown    |                        | 8                       | 7.8 – 10.1                     |
| Gia        | F   | East      | 2.6                          | Yes        | 17 months              | 8                       | 10.6 – 11.9                    |
| Maimouna   | F   | East      | 4.7                          | No         |                        | 20                      | 6.7 – 8.9                      |
| Quarantine | F   | East      | 5.5                          | Yes        | > 2 years              | 4                       | 7.6 – 7.9                      |
| Richelieu  | M   | East      | 5.4                          | Unknown    |                        | 64                      | 10.7 – 11.8                    |
| Willy      | M   | East      | 10.5                         | Unknown    |                        | 57                      | 10.5 – 11.9                    |
| Baloo      | F   | South     | 3.8                          | yes        | 1 year                 | 22                      | 7.3 – 8.5                      |
| Caramel    | M   | South     | 7.3                          | Unknown    |                        | 4                       | 8.7 – 9.3                      |
| Mohan      | F   | South     | 4.1                          | Yes        | 1.5 year               | 34                      | 4.1 – 6.5                      |
| Oscar      | M   | South     | 4.7                          | Yes        | > 2 years              | 49                      | 8.1 – 11.9                     |
| Wala       | F   | South     | 4.9                          | Unknown    |                        | 25                      | 8.1 – 10.9                     |
| Roxane     | F   | North     | 4.7                          | Unknown    |                        | 4                       | 10.5 – 11.3                    |
| Volta      | F   | North     | 3.8                          | Unknown    |                        | 3                       | 10.7 – 10.7                    |

1021  
 1022 *\*data taken from Samuni et al. 2019*

1023

1024

1025

1026
